# Supplementary material
Source: PubMed Central journal article supplement (PMC11113786)
Supplement: 18_2013_1402_MOESM3_ESM.pdf [file 18_2013_1402_MOESM3_ESM.pdf]

**Table S1. Up-regulated genes in BDV-infected SD slice cultures.** Genes induced more than 2-fold at 23 days post infection are listed.

| Gene ID       | p-value  | Corrected p-value | FC Absolute | regulation | Common name        | GeneSymbol           | GenbankAccession | EnsemblID          | EntrezGene | RefSeq       |
|---------------|----------|-------------------|-------------|------------|--------------------|----------------------|------------------|--------------------|------------|--------------|
| A 44 P283726  | 8.27E-05 | 1.62E-03          | 150.10      | up         | NM 001007694       | ifit3                | NM_001007694     | ENSRNOT00000031025 | 309526     | NM_001007694 |
| A 44 P294675  | 4.86E-04 | 3.18E-03          | 135.92      | up         | NM 003687          | Slim3                | NM_003687        | ENSRNOT00000012859 | 114247     | NM_003687    |
| A 44 P391672  | 9.86E-04 | 4.47E-03          | 93.32       | up         | ENSRNOT00000028855 | ENSRNOT00000028855   |                  | ENSRNOT00000028855 |            | XM_230608    |
| A 44 P1039994 | 9.95E-05 | 1.70E-03          | 68.68       | up         | NM 001033691       | ifit7                | NM_001033691     | ENSRNOT00000023504 | 293624     | NM_001033691 |
| A 42 P565621  | 8.30E-06 | 1.35E-03          | 58.77       | up         | ENSRNOT00000010594 | Slamf9_predicted     |                  | ENSRNOT00000010594 | 289235     | XM_213932    |
| A 44 P157229  | 8.70E-06 | 1.35E-03          | 49.87       | up         | NM 001014058       | Usp18                | NM_001014058     |                    | 312688     | NM_001014058 |
| A 42 P729340  | 1.82E-04 | 2.16E-03          | 49.39       | up         | NM 138913          | Oas1                 | NM_138913        | ENSRNOT00000038426 | 192281     | NM_138913    |
| A 44 P196172  | 8.30E-05 | 1.62E-03          | 48.78       | up         | NM 138881          | Best5                | NM_138881        | ENSRNOT00000010092 | 65190      | NM_138881    |
| A 44 P226999  | 1.68E-04 | 2.13E-03          | 45.48       | up         | NM 001009680       | Oas1                 | NM_001009680     | ENSRNOT00000043279 | 304507     | NM_001009680 |
| A 44 P1013314 | 1.91E-04 | 2.19E-03          | 44.64       | up         | ENSRNOT00000039263 | G1p2_predicted       |                  | ENSRNOT00000039263 | 298693     | XM_216605    |
| A 44 P284200  | 1.03E-04 | 1.70E-03          | 43.69       | up         | NM 001014058       | Usp18                | NM_001014058     |                    | 312688     | NM_001014058 |
| A 44 P653053  | 9.37E-03 | 1.87E-02          | 42.58       | up         | NM 001017496       | LOC498335            | NM_001017496     |                    | 498335     | NM_001017496 |
| A 44 P428642  | 8.20E-04 | 4.18E-03          | 42.46       | up         | AJ302054           | Zbp1                 | AJ302054         | ENSRNOT0000008365  | 171091     | XM_342594    |
| A 44 P696994  | 8.59E-05 | 1.62E-03          | 41.25       | up         | NM 001024753       | ifit2                | NM_001024753     | ENSRNOT00000054757 | 294091     | NM_001024753 |
| A 44 P975601  | 3.32E-05 | 1.37E-03          | 37.60       | up         | NM 001014235       | LOC364393            | NM_001014235     |                    | 364393     | NM_001014235 |
| A 44 P1057055 | 2.16E-04 | 2.26E-03          | 36.72       | up         | XM 213425          | Ccl12_predicted      | XM_213425        |                    | 287562     | XM_213425    |
| A 43 P14036   | 7.34E-05 | 1.62E-03          | 35.50       | up         | NM 206846          | isg12(b)             | NM_206846        |                    | 299269     | NM_206846    |
| A 44 P786825  | 2.28E-04 | 2.31E-03          | 29.90       | up         | XM 001079971       | ifit1_predicted      | XM_001079971     |                    | 294090     | XM_001079971 |
| A 44 P123926  | 1.72E-05 | 1.35E-03          | 28.95       | up         | NM 227820          | LOC310968            | NM_227820        |                    | 310968     | XM_227820    |
| A 44 P423691  | 5.24E-05 | 1.52E-03          | 28.70       | up         | NM 012976          | Lgals5               | NM_012976        | ENSRNOT00000016897 | 25475      | NM_012976    |
| A 44 P492025  | 4.62E-04 | 3.16E-03          | 25.92       | up         | NM 001009681       | Oas1                 | NM_001009681     | ENSRNOT0000001570  | 304545     | NM_001009681 |
| A 44 P304323  | 2.56E-05 | 1.37E-03          | 24.80       | up         | NM 031116          | Ccl5                 | NM_031116        | ENSRNOT00000014865 | 81780      | NM_031116    |
| A 44 P396202  | 4.55E-04 | 3.14E-03          | 21.51       | up         | NM 001024884       | RGD1309362           | NM_001024884     | ENSRNOT00000043736 | 307415     | NM_001024884 |
| A 44 P832019  | 9.91E-05 | 1.70E-03          | 21.29       | up         | NM 001014235       | LOC364393            | NM_001014235     |                    | 364393     | NM_001014235 |
| A 44 P532270  | 3.46E-05 | 1.37E-03          | 20.79       | up         | ENSRNOT00000031023 | Herc6                |                  | ENSRNOT00000031023 | 362376     | XM_342700    |
| A 44 P150017  | 2.06E-04 | 2.25E-03          | 20.66       | up         | TC582911           | TC582911             |                  |                    |            |              |
| A 44 P1039634 | 1.44E-02 | 2.49E-02          | 18.70       | up         | ENSRNOT00000017562 | Odf3_predicted       |                  | ENSRNOT00000017562 | 365387     | XM_344975    |
| A 44 P370190  | 6.81E-03 | 1.50E-02          | 18.39       | up         | NM 138881          | Best5                | NM_138881        | ENSRNOT00000010092 | 65190      | NM_138881    |
| A 42 P661992  | 3.17E-04 | 2.74E-03          | 18.18       | up         | XM 001075548       | LOC690768            | XM_001075548     |                    | 690768     | XM_001075548 |
| A 44 P396379  | 3.72E-03 | 1.02E-02          | 17.98       | up         | NM 222950          | RGD1562462_predicted | XM_222950        | ENSRNOT00000058058 | 289245     | NM_222950    |
| A 42 P736315  | 7.37E-05 | 1.62E-03          | 17.62       | up         | ENSRNOT00000043660 | Rtp4_predicted       |                  | ENSRNOT00000043660 | 360733     | XM_001056345 |
| A 44 P199187  | 1.90E-04 | 2.19E-03          | 17.47       | up         | NM 001012353       | MGC108823            | NM_001012353     | ENSRNOT00000050063 | 307414     | NM_001012353 |
| A 42 P504653  | 3.41E-04 | 2.81E-03          | 17.32       | up         | NM 017143          | F10                  | NM_017143        | ENSRNOT00000026677 | 29243      | NM_017143    |
| A 44 P358358  | 3.24E-04 | 2.77E-03          | 17.26       | up         | NM 001002821       | H2-T18               | NM_001002821     | ENSRNOT00000061395 | 406194     | NM_001002821 |
| A 44 P419064  | 1.59E-03 | 6.00E-03          | 17.16       | up         | NM 212466          | Cfb                  | NM_212466        | ENSRNOT00000033942 | 294257     | NM_212466    |
| A 44 P214846  | 4.91E-05 | 1.47E-03          | 16.47       | up         | NM 134350          | Mx2                  | NM_134350        | ENSRNOT00000020695 | 286918     | NM_134350    |
| A 44 P973681  | 6.44E-03 | 1.46E-02          | 16.33       | up         | AW141066           | AW141066             | AW141066         |                    |            |              |
| A 44 P1039128 | 5.25E-04 | 3.35E-03          | 16.00       | up         | NM 139089          | Cxcl10               | NM_139089        | ENSRNOT00000030075 | 245920     | NM_139089    |
| A 44 P126061  | 6.15E-05 | 1.60E-03          | 15.45       | up         | NM 001009682       | Oas1                 | NM_001009682     | ENSRNOT0000001600  | 304549     | NM_001009682 |
| A 42 P557394  | 4.78E-05 | 1.47E-03          | 15.30       | up         | NM 001008510       | isg20                | NM_001008510     | ENSRNOT00000024826 | 293052     | NM_001008510 |
| A 42 P527724  | 4.52E-05 | 1.47E-03          | 15.28       | up         | NM 053634          | Fcnb                 | NM_053634        | ENSRNOT00000012494 | 114091     | NM_053634    |
| A 44 P187530  | 2.17E-04 | 2.26E-03          | 15.00       | up         | NM 001008858       | RT1-T2-1             | NM_001008858     | ENSRNOT00000041502 | 361787     | NM_001008858 |
| A 44 P317250  | 2.66E-04 | 2.51E-03          | 14.45       | up         | AA819034           | AA819034             | AA819034         |                    |            |              |
| A 44 P328136  | 9.40E-05 | 1.67E-03          | 14.22       | up         | NM 173096          | Mx1                  | NM_173096        | ENSRNOT00000039876 | 24575      | NM_173096    |
| A 44 P1029397 | 6.70E-06 | 1.35E-03          | 14.00       | up         | NM 198134          | Bst2                 | NM_198134        |                    | 378947     | NM_198134    |
| A 44 P529569  | 7.38E-04 | 3.84E-03          | 13.99       | up         | BF542741           | BF542741             | BF542741         |                    |            |              |
| A 44 P110352  | 2.00E-03 | 6.93E-03          | 13.79       | up         | ENSRNOT00000032512 | ENSRNOT00000032512   |                  | ENSRNOT00000032512 |            |              |
| A 44 P423641  | 8.89E-04 | 4.28E-03          | 13.34       | up         | NM 012977          | Lgals9               | NM_012977        | ENSRNOT00000010701 | 25476      | NM_012977    |
| A 44 P410016  | 9.21E-03 | 1.85E-02          | 13.01       | up         | NM 001024753       | ifit2                | NM_001024753     | ENSRNOT00000054757 | 294091     | NM_001024753 |
| A 44 P306930  | 9.25E-03 | 1.86E-02          | 12.74       | up         | ENSRNOT00000036512 | LOC684383            |                  | ENSRNOT00000036512 | 684383     | XM_001072319 |
| A 44 P212964  | 5.33E-04 | 3.37E-03          | 12.56       | up         | ENSRNOT0000003012  | Plac8_predicted      |                  | ENSRNOT0000003012  | 360914     | XM_341188    |
| A 44 P1029403 | 9.66E-06 | 1.35E-03          | 12.44       | up         | NM 198134          | Bst2                 | NM_198134        | ENSRNOT00000036276 | 378947     | NM_198134    |
| A 44 P1020608 | 1.09E-04 | 1.74E-03          | 11.93       | up         | ENSRNOT00000029990 | ifit4                |                  | ENSRNOT00000029990 | 310969     | XM_227821    |
| A 44 P901471  | 2.45E-05 | 1.37E-03          | 11.42       | up         | TC594336           | TC594336             |                  |                    |            |              |
| A 43 P21799   | 7.94E-05 | 1.62E-03          | 11.26       | up         | ENSRNOT00000024718 | RGD1310093_predicted |                  | ENSRNOT00000024718 | 303538     | XM_220978    |
| A 44 P444614  | 3.21E-05 | 1.37E-03          | 11.26       | up         | BF284803           | BF284803             | BF284803         |                    |            |              |
| A 43 P15536   | 1.07E-02 | 2.06E-02          | 11.01       | up         | NM 019127          | ifnb1                | NM_019127        | ENSRNOT0000008224  | 24481      | NM_019127    |
| A 44 P1020615 | 2.67E-04 | 2.51E-03          | 10.36       | up         | ENSRNOT00000029990 | ifit4                |                  | ENSRNOT00000029990 | 310969     | XM_227821    |
| A 44 P1053321 | 1.91E-05 | 1.35E-03          | 9.88        | up         | NM 133624          | Gbp2                 | NM_133624        |                    | 171164     | NM_133624    |
| A 44 P227046  | 5.70E-04 | 3.45E-03          | 9.62        | up         | NM 222949          | Aim2_predicted       | XM_222949        | ENSRNOT00000040623 | 304987     | XM_222949    |
| A 44 P407771  | 2.64E-04 | 2.51E-03          | 9.53        | up         | ENSRNOT00000029990 | ifit4                |                  | ENSRNOT00000029990 | 310969     | XM_227821    |
| A 42 P538670  | 2.59E-04 | 2.51E-03          | 9.50        | up         | NM 023965          | Cybb                 | NM_023965        | ENSRNOT00000038994 | 66021      | NM_023965    |
| A 44 P528552  | 1.35E-05 | 1.35E-03          | 9.21        | up         | ENSRNOT00000052003 | Tyki_predicted       |                  | ENSRNOT00000052003 | 314004     | XM_234017    |
| A 44 P50785   | 2.93E-05 | 1.37E-03          | 9.15        | up         | ENSRNOT00000037339 | Gbp5_predicted       |                  | ENSRNOT00000037339 | 362050     | XM_342352    |
| A 44 P373660  | 1.39E-02 | 2.45E-02          | 9.09        | up         | AI408440           | AI408440             | AI408440         |                    |            |              |
| A 44 P933121  | 3.88E-04 | 2.92E-03          | 8.95        | up         | TC594767           | TC594767             |                  |                    |            |              |
| A 44 P156642  | 1.11E-03 | 4.78E-03          | 8.94        | up         | XM 218339          | RGD1304717_predicted | XM_218339        |                    | 308436     | XM_218339    |
| A 43 P11359   | 7.39E-04 | 3.84E-03          | 8.94        | up         | AW921109           | AW921109             | AW921109         |                    |            |              |
| A 44 P164188  | 1.56E-03 | 5.97E-03          | 8.73        | up         | NM 221401          | RGD1310490_predicted | NM_221401        | ENSRNOT00000046888 | 303903     | NM_221401    |
| A 44 P180431  | 1.79E-02 | 2.91E-02          | 8.71        | up         | ENSRNOT00000036512 | LOC684383            |                  | ENSRNOT00000036512 | 684383     | XM_001072319 |
| A 44 P422880  | 1.42E-03 | 5.60E-03          | 8.62        | up         | AI045512           | AI045512             | AI045512         |                    |            |              |
| A 44 P928825  | 1.31E-02 | 2.36E-02          | 8.53        | up         | ENSRNOT00000017339 | RGD1564316_predicted |                  | ENSRNOT00000017339 | 498638     | XM_573919    |
| A 44 P444610  | 1.72E-02 | 2.82E-02          | 8.47        | up         | BF284803           | BF284803             | BF284803         |                    |            |              |
| A 44 P454420  | 2.22E-04 | 2.27E-03          | 8.27        | up         | AF029241           | RT1-S3               | AF029241         |                    | 294228     |              |
| A 44 P1025349 | 1.83E-04 | 2.16E-03          | 8.12        | up         | ENSRNOT00000046483 | Ube11_predicted      |                  | ENSRNOT00000046483 | 301000     | NM_217252    |
| A 44 P992056  | 1.39E-04 | 1.91E-03          | 8.11        | up         | NM 001024967       | Tmem106a             | NM_001024967     | ENSRNOT00000035523 | 287722     | NM_001024967 |
| A 44 P824935  | 5.62E-03 | 1.32E-02          | 8.08        | up         | TC640745           | TC640745             |                  |                    |            |              |
| A 42 P521707  | 1.04E-04 | 1.70E-03          | 8.05        | up         | L23128             | RT1-N3               | L23128           | ENSRNOT00000010335 | 24750      |              |
| A 44 P590748  | 2.30E-05 | 1.37E-03          | 8.02        | up         | ENSRNOT00000009620 | RGD1560496_predicted |                  | ENSRNOT00000009620 | 499801     | XM_575141    |
| A 44 P164512  | 2.75E-05 | 1.37E-03          | 7.97        | up         | NM 032612          | Stat1                | NM_032612        | ENSRNOT00000052121 | 25124      | NM_032612    |
| A 42 P840729  | 9.32E-03 | 1.86E-02          | 7.92        | up         | DV725094           | DV725094             | DV725094         |                    |            |              |
| A 44 P534349  | 2.25E-02 | 3.43E-02          | 7.91        | up         | XM 224738          | XM 224738            | XM_224738        | ENSRNOT00000038944 |            |              |
| A 44 P103411  | 6.57E-04 | 3.75E-03          | 7.88        | up         | BM385476           | BM385476             | BM385476         |                    |            |              |
| A 44 P554917  | 4.23E-04 | 3.04E-03          | 7.72        | up         | NM 206848          | RT1-C1               | NM_206848        |                    | 24977      | NM_206848    |
| A 44 P1042473 | 5.35E-05 | 1.52E-03          | 7.68        | up         | NM 139096          | Lgals3bp             | NM_139096        | ENSRNOT0000004320  | 245955     | NM_139096    |
| A 44 P382312  | 4.75E-04 | 3.16E-03          | 7.64        | up         | ENSRNOT00000050626 | RGD1306056_predicted |                  | ENSRNOT00000050626 | 296474     | XM_230961    |
| A 44 P324707  | 8.11E-05 | 1.62E-03          | 7.59        | up         | NM 012645          | RT1-Aw2              | NM_012645        |                    | 24737      | NM_012645    |
| A 44 P15868   | 3.03E-03 | 9.14E-03          | 7.54        | up         | TC616139           | TC616139             |                  |                    |            |              |
| A 43 P15427   | 1.43E-03 | 5.65E-03          | 7.51        | up         | NM 022670          | Sct                  | NM_022670        | ENSRNOT00000024094 | 24769      | NM_022670    |
| A 44 P332606  | 6.12E-05 | 1.60E-03          | 7.49        | up         | NM 172222          | C2                   | NM_172222        | ENSRNOT00000060607 | 24231      | NM_172222    |
| A 44 P918566  | 2.18E-04 | 2.26E-03          | 7.27        | up         | TC593044           | TC593044             |                  |                    |            |              |
| A 44 P544063  | 1.83E-05 | 1.35E-03          | 7.22        | up         | NM 001012007       | Irgm                 | NM_001012007     | ENSRNOT00000045545 | 303090     | NM_001012007 |

|               |          |          |      |    |                     |                      |              |                     |              |              |
|---------------|----------|----------|------|----|---------------------|----------------------|--------------|---------------------|--------------|--------------|
| A 44 P318778  | 8.52E-03 | 1.77E-02 | 5.55 | up | ENSRNOT00000055210  | Trim34_predicted     |              | ENSRNOT00000055210  | 293294       | XM 219045    |
| A 44 P448892  | 6.24E-03 | 1.43E-02 | 5.51 | up | AA899841            | AA899841             | AA899841     |                     |              |              |
| A 43 P21657   | 6.02E-05 | 1.60E-03 | 5.49 | up | XR_008610           | RGD1561472_predicted | XR_008610    | 500012              | XR 008610    |              |
| A 44 P855088  | 4.70E-03 | 1.18E-02 | 5.48 | up | TC602624            | TC602624             |              |                     |              |              |
| A 44 P457548  | 4.90E-04 | 3.18E-03 | 5.40 | up | ENSRNOT00000030975  | Parp9_predicted      |              | ENSRNOT00000030975  | 303905       | XM 221404    |
| A 44 P1037456 | 8.90E-04 | 4.28E-03 | 5.36 | up | XM 243609           | Col22a1_predicted    | XM 243609    | 315071              | XM 001072793 |              |
| A 44 P932042  | 3.79E-03 | 1.03E-02 | 5.29 | up | BF544728            | BF544728             | BF544728     |                     |              |              |
| A 44 P1028196 | 1.74E-04 | 2.16E-03 | 5.25 | up | NM 001017467        | LOC362934            | NM 001017467 | ENSRNOT00000009333  | 362934       | NM 001017467 |
| A 43 P10593   | 1.82E-04 | 2.16E-03 | 5.22 | up | NM 032612           | Stat1                | NM 032612    |                     | 25124        | NM 032612    |
| A 44 P313661  | 1.37E-05 | 1.35E-03 | 5.12 | up | NM 001008835        | RT1-CE12             | NM 001008835 |                     | 309600       | NM 001008835 |
| A 44 P427695  | 9.68E-05 | 1.70E-03 | 5.06 | up | NM 001009683        | Tor3a                | NM 001009683 | ENSRNOT0000005726   | 304884       | NM 001009683 |
| A 44 P252630  | 2.18E-04 | 2.26E-03 | 5.04 | up | NM 001047860        | RGD1306344           | NM 001047860 | ENSRNOT00000055127  | 296384       | NM 001047860 |
| A 44 P704966  | 1.06E-03 | 4.64E-03 | 4.97 | up | BI285978            | BI285978             |              |                     |              |              |
| A 44 P521505  | 8.81E-04 | 4.28E-03 | 4.88 | up | AA866448            | AA866448             | AA866448     |                     |              |              |
| A 42 P616287  | 5.30E-04 | 3.37E-03 | 4.87 | up | ENSRNOT00000015897  | C1r                  |              | ENSRNOT00000015897  | 312705       | XM 242644    |
| A 44 P271423  | 3.41E-04 | 2.81E-03 | 4.85 | up | NM 173045           | Zc3hav1              | NM 173045    | ENSRNOT00000017305  | 252832       | NM 173045    |
| A 44 P107372  | 3.61E-04 | 2.87E-03 | 4.82 | up | NM 001008840        | RT1-CE2              | NM 001008840 | ENSRNOT00000048076  | 414779       | NM 001008840 |
| A 44 P513029  | 8.58E-06 | 1.35E-03 | 4.82 | up | NM 001008832        | RT1-CE1              | NM 001008832 | ENSRNOT00000041917  | 309603       | NM 001008832 |
| A 44 P218695  | 1.41E-02 | 2.46E-02 | 4.80 | up | BQ209491            | BQ209491             |              |                     |              |              |
| A 44 P412998  | 1.81E-04 | 2.16E-03 | 4.73 | up | NM 001017467        | LOC362934            | NM 001017467 | ENSRNOT00000009333  | 362934       | NM 001017467 |
| A 44 P296155  | 2.14E-05 | 1.37E-03 | 4.69 | up | NM 001008829        | RT1-A2               | NM 001008829 | ENSRNOT0000000544   | 24974        | NM 001008829 |
| A 44 P522318  | 3.49E-04 | 2.81E-03 | 4.67 | up | NM 181476           | Gpr109a              | NM 181476    | ENSRNOT00000032249  | 353250       | NM 181476    |
| A 44 P281510  | 1.13E-02 | 2.14E-02 | 4.65 | up | NM 001097582        | Tir7_predicted       | NM 001097582 | ENSRNOT0000005620   | 317468       | NM 001097582 |
| A 44 P608475  | 2.93E-03 | 8.91E-03 | 4.61 | up | TC633776            | TC633776             |              |                     |              |              |
| A 44 P348614  | 7.06E-04 | 3.83E-03 | 4.60 | up | NM 001034137        | Sp110                | NM 001034137 | ENSRNOT00000056995  | 301570       | NM 001034137 |
| A 44 P462306  | 1.29E-03 | 5.28E-03 | 4.55 | up | CV115642            | CV115642             | CV115642     |                     |              |              |
| A 44 P803484  | 1.54E-04 | 1.99E-03 | 4.55 | up | BG666368            | BG666368             | BG666368     |                     |              |              |
| A 44 P281284  | 1.28E-04 | 1.87E-03 | 4.54 | up | ENSRNOT00000032301  | RGD1310185_predicted |              | ENSRNOT00000032301  | 313790       | XM 233749    |
| A 44 P523000  | 4.67E-04 | 3.16E-03 | 4.53 | up | NM 001080361        | LOC691960            | XM 001080361 | 691960              | XM 001080361 |              |
| A 44 P212551  | 2.49E-02 | 3.70E-02 | 4.48 | up | NM 053858           | Ccl4                 | NM 053858    | ENSRNOT00000015199  | 116637       | NM 053858    |
| A 44 P301963  | 4.90E-04 | 3.18E-03 | 4.47 | up | NM 012708           | Psmb9                | NM 012708    | ENSRNOT0000000532   | 24967        | NM 012708    |
| A 43 P15847   | 2.80E-03 | 8.71E-03 | 4.47 | up | NM 178847           | Cyp27a1              | NM 178847    | ENSRNOT00000023152  | 301517       | NM 178847    |
| A 44 P715283  | 9.09E-03 | 1.83E-02 | 4.46 | up | CV080648            | CV080648             |              |                     |              |              |
| A 44 P522847  | 1.53E-04 | 1.99E-03 | 4.44 | up | ENSRNOT00000017938  | Pik3ap1_predicted    |              | ENSRNOT00000017938  | 294048       | XM 220008    |
| A 44 P529899  | 2.38E-02 | 3.57E-02 | 4.43 | up | CO558942            | CO558942             | CO558942     |                     |              |              |
| A 44 P440517  | 1.45E-05 | 1.35E-03 | 4.42 | up | NM 001008842        | RT1-CE4              | NM 001008842 | ENSRNOT00000041151  | 414783       | NM 001008842 |
| A 44 P325589  | 7.30E-03 | 1.57E-02 | 4.42 | up | NM 001000737        | Olr164_predicted     | NM 001000737 | ENSRNOT00000043057  | 404998       | NM 001000737 |
| A 44 P391296  | 1.23E-02 | 2.26E-02 | 4.41 | up | NM 001007612        | Ccl7                 | NM 001007612 | ENSRNOT00000000256  | 287561       | NM 001007612 |
| A 44 P184753  | 4.57E-04 | 3.14E-03 | 4.40 | up | NM 001008829        | RT1-A2               | NM 001008829 | ENSRNOT00000000544  | 24974        | NM 001008829 |
| A 44 P352538  | 2.64E-04 | 2.51E-03 | 4.39 | up | NM 001013043        | Sectm1a              | NM 001013043 | ENSRNOT000000054931 | 287885       | NM 001013043 |
| A 44 P274061  | 2.10E-02 | 3.25E-02 | 4.39 | up | NM 001008841        | RT1-CE3              | NM 001008841 | ENSRNOT00000005009  | 414793       | NM 001008841 |
| A 44 P836120  | 2.36E-04 | 2.37E-03 | 4.39 | up | DV717880            | DV717880             |              |                     |              |              |
| A 42 P732259  | 9.62E-04 | 4.47E-03 | 4.39 | up | NM 001024976        | RGD1304835           | NM 001024976 | ENSRNOT00000057317  | 294430       | NM 001024976 |
| A 42 P467037  | 2.46E-05 | 1.37E-03 | 4.38 | up | NM 019335           | Prkr                 | NM 019335    |                     | 54287        | NM 019335    |
| A 44 P164192  | 7.46E-05 | 1.62E-03 | 4.37 | up | NM 221401           | RGD1310490_predicted | XM 221401    | ENSRNOT00000046888  | 303903       | XM 221401    |
| A 44 P554925  | 1.88E-05 | 1.35E-03 | 4.33 | up | NM 206848           | RT1-CI               | NM 206848    | ENSRNOT00000041590  | 24977        | NM 206848    |
| A 44 P860755  | 8.73E-04 | 4.26E-03 | 4.33 | up | TC596991            | TC596991             |              |                     |              |              |
| A 44 P318466  | 2.03E-03 | 6.98E-03 | 4.30 | up | NM 001009536        | Trim25               | NM 001009536 |                     | 494338       | NM 001009536 |
| A 44 P487798  | 3.51E-04 | 2.81E-03 | 4.23 | up | NM 001011905        | Stat2                | NM 001011905 | ENSRNOT00000049536  | 288774       | NM 001011905 |
| A 43 P19238   | 7.73E-04 | 3.99E-03 | 4.23 | up | NM 001034137        | Sp110                | NM 001034137 | ENSRNOT00000056995  | 301570       | NM 001034137 |
| A 44 P252935  | 1.70E-03 | 6.24E-03 | 4.22 | up | XM 223421           | XM 223421            | XM 223421    |                     |              |              |
| A 44 P771346  | 1.95E-04 | 2.19E-03 | 4.22 | up | NM 022441           | Acrv11               | NM 022441    | ENSRNOT00000008673  | 25237        | NM 022441    |
| A 44 P309052  | 3.25E-04 | 2.77E-03 | 4.21 | up | NM 001008853        | RT1-M6-2             | NM 001008853 | ENSRNOT000000041500 | 365527       | NM 001008853 |
| A 44 P444001  | 1.02E-03 | 4.54E-03 | 4.20 | up | NM 001013430        | RhoH                 | NM 001013430 | ENSRNOT00000003425  | 305341       | NM 001013430 |
| A 44 P365611  | 2.27E-02 | 3.45E-02 | 4.17 | up | ENSRNOT000000060121 | Gpr31_predicted      |              | ENSRNOT000000060121 | 292310       | XM 217867    |
| A 44 P361047  | 1.97E-02 | 3.09E-02 | 4.14 | up | ENSRNOT000000041225 | ENSRNOT000000041225  |              | ENSRNOT000000041225 |              | XR 009387    |
| A 42 P660129  | 6.81E-03 | 1.50E-02 | 4.13 | up | NM 130422           | Casp12               | NM 130422    | ENSRNOT00000010243  | 156117       | NM 130422    |
| A 44 P1022002 | 1.65E-02 | 2.74E-02 | 4.12 | up | NM 001007612        | Ccl7                 | NM 001007612 | ENSRNOT00000000256  | 287561       | NM 001007612 |
| A 44 P679072  | 5.64E-04 | 3.45E-03 | 4.10 | up | AA997015            | AA997015             | AA997015     |                     |              |              |
| A 44 P462661  | 1.60E-04 | 2.04E-03 | 4.06 | up | NM 022194           | Il1rn                | NM 022194    | ENSRNOT00000007949  | 60582        | NM 022194    |
| A 44 P450284  | 6.99E-03 | 1.53E-02 | 4.06 | up | NM 227986           | NM 227986            | XM 227986    |                     |              |              |
| A 42 P695401  | 1.54E-02 | 2.60E-02 | 3.95 | up | NM 031530           | Ccl2                 | NM 031530    | ENSRNOT00000009448  | 24770        | NM 031530    |
| A 44 P182020  | 5.55E-04 | 3.45E-03 | 3.91 | up | NM 080767           | Psmb8                | NM 080767    | ENSRNOT00000005028  | 24968        | NM 080767    |
| A 44 P372823  | 1.19E-04 | 1.77E-03 | 3.91 | up | XM 342309           | XM 342309            | XM 342309    |                     |              |              |
| A 44 P255817  | 1.66E-03 | 6.19E-03 | 3.91 | up | ENSRNOT000000060002 | RGD1564330_predicted |              | ENSRNOT000000060002 | 362848       | XM 343179    |
| A 44 P221168  | 6.28E-03 | 1.44E-02 | 3.83 | up | AF387339            | AF387339             | AF387339     |                     |              |              |
| A 42 P698972  | 2.02E-04 | 2.25E-03 | 3.82 | up | NM 033098           | Tapbp                | NM 033098    | ENSRNOT00000044975  | 25217        | NM 033098    |
| A 42 P659321  | 1.38E-03 | 5.52E-03 | 3.82 | up | XM 001069323        | RGD1304620_predicted | XM 001069323 |                     | 304914       | XM 001069323 |
| A 44 P452222  | 3.96E-03 | 1.06E-02 | 3.81 | up | NM 001033998        | Il1ga                | NM 001033998 | ENSRNOT00000024404  | 308995       | XM 001033998 |
| A 44 P850918  | 3.28E-03 | 9.48E-03 | 3.79 | up | AW142569            | AW142569             | AW142569     |                     |              |              |
| A 44 P115116  | 4.05E-04 | 2.94E-03 | 3.79 | up | NM 022617           | Mpeg1                | NM 022617    |                     | 64552        | NM 022617    |
| A 44 P289637  | 1.18E-02 | 2.19E-02 | 3.73 | up | NM 012651           | Sic4a1               | NM 012651    | ENSRNOT00000028445  | 24779        | NM 012651    |
| A 42 P605711  | 3.57E-02 | 4.79E-02 | 3.70 | up | XM 217218           | RGD1311381_predicted | XM 217218    |                     | 300870       | XM 001063356 |
| A 44 P459288  | 7.03E-05 | 1.62E-03 | 3.69 | up | ENSRNOT00000050798  | ENSRNOT00000050798   |              | ENSRNOT00000050798  |              | XM 223172    |
| A 43 P22739   | 1.06E-03 | 4.64E-03 | 3.66 | up | XM 576974           | RGD1565785_predicted | XM 576974    |                     | 501570       | XM 001061435 |
| A 44 P403133  | 5.14E-04 | 3.31E-03 | 3.64 | up | XM 344628           | XM 344628            | XM 344628    |                     |              |              |
| A 44 P306439  | 1.23E-03 | 5.12E-03 | 3.62 | up | NM 207603           | Fcgr3a               | NM 207603    | ENSRNOT00000047434  | 304966       | NM 207603    |
| A 44 P867246  | 1.02E-02 | 2.00E-02 | 3.62 | up | NM 001008839        | RT1-CE16             | NM 001008839 |                     | 414819       | NM 001008839 |
| A 44 P257893  | 3.54E-02 | 4.78E-02 | 3.62 | up | ENSRNOT00000022648  | Gbp4_predicted       |              | ENSRNOT00000022648  | 310917       | XM 227762    |
| A 43 P10651   | 1.78E-03 | 6.34E-03 | 3.59 | up | BX883046            | BX883046             | BX883046     |                     |              |              |
| A 44 P180229  | 2.11E-03 | 7.21E-03 | 3.59 | up | XR_009137           | RGD1565457_predicted | XR_009137    |                     | 288589       | XR 009137    |
| A 44 P173330  | 7.13E-04 | 3.83E-03 | 3.59 | up | NM 001024999        | RGD1307787           | NM 001024999 | ENSRNOT00000019130  | 307742       | NM 001024999 |
| A 44 P792845  | 1.73E-02 | 2.83E-02 | 3.58 | up | TC601188            | TC601188             |              |                     |              |              |
| A 43 P17507   | 4.81E-03 | 1.19E-02 | 3.55 | up | BM386675            | BM386675             | BM386675     |                     |              |              |
| A 44 P253059  | 6.72E-05 | 1.62E-03 | 3.54 | up | ENSRNOT00000018061  | LOC1031756           |              | ENSRNOT00000018061  | 310756       | XM 227549    |
| A 44 P172850  | 4.02E-03 | 1.06E-02 | 3.52 | up | NM 001008843        | RT1-CE5              | NM 001008843 | ENSRNOT00000038495  | 309607       | NM 001008843 |
| A 42 P588738  | 3.28E-05 | 1.37E-03 | 3.52 | up | NM 133542           | Igsf6                | NM 133542    | ENSRNOT00000023262  | 117064       | NM 133542    |
| A 43 P18268   | 6.27E-05 | 1.60E-03 | 3.49 | up | CF110390            | CF110390             | CF110390     |                     |              |              |
| A 42 P463880  | 1.65E-02 | 2.74E-02 | 3.48 | up | NM 001013927        | RGD1308734           | NM 001013927 | ENSRNOT00000011930  | 297694       | NM 001013927 |
| A 44 P742272  | 9.61E-04 | 4.47E-03 | 3.47 | up | NM 022686           | Hist1h4b             | NM 022686    | ENSRNOT00000043151  | 64627        | NM 022686    |
| A 43 P21634   | 3.21E-03 | 9.44E-03 | 3.45 | up | NM 031504           | C4a                  | NM 031504    | ENSRNOT00000031704  | 24233        | NM 031504    |
| A 44 P213407  | 1.50E-02 | 2.55E-02 | 3.44 | up | ENSRNOT00000043434  | RGD1562602_predicted |              | ENSRNOT00000043434  | 315713       | XM 236296    |
| A 44 P192801  | 4.40E-03 | 1.13E-02 | 3.40 | up | BF283485            | BF283485             |              |                     |              |              |
| A 43 P19789   | 4.00E-04 | 2.93E-03 | 3.38 | up | DV723306            | DV723306             | DV723306     | ENSRNOT00000006376  |              | XM           |



|               |          |          |      |    |                     |                      |              |                     |        |              |
|---------------|----------|----------|------|----|---------------------|----------------------|--------------|---------------------|--------|--------------|
| A 44 P993914  | 2.05E-02 | 3.18E-02 | 2.33 | up | NM 001014125        | Pdia5                | NM 001014125 | ENSRNOT00000048283  | 360722 | NM 001014125 |
| A 44 P160174  | 3.23E-02 | 4.48E-02 | 2.33 | up | AI178629            | AI178629             | AI178629     |                     |        |              |
| A 43 P13426   | 3.50E-02 | 4.77E-02 | 2.32 | up | NM 173339           | Ceacam10             | NM 173339    |                     | 287009 | NM 173339    |
| A 44 P553098  | 1.73E-03 | 6.27E-03 | 2.31 | up | NM 001044247        | LOC361187            | NM 001044247 |                     | 361187 | NM 001044247 |
| A 44 P622992  | 4.73E-04 | 3.16E-03 | 2.30 | up | NM 001024339        | LOC500377            | NM 001024339 |                     | 500377 | NM 001024339 |
| A 44 P438117  | 1.95E-04 | 2.19E-03 | 2.30 | up | NM 019336           | Rgs1                 | NM 019336    | ENSRNOT00000005251  | 54289  | NM 019336    |
| A 44 P1007008 | 4.33E-03 | 1.12E-02 | 2.29 | up | NM 001024755        | Ube26                | NM 001024755 | ENSRNOT000000044319 | 295704 | NM 001024755 |
| A 44 P840118  | 2.75E-02 | 3.97E-02 | 2.29 | up | TC644908            | TC644908             |              |                     |        |              |
| A 44 P972303  | 3.89E-05 | 1.42E-03 | 2.29 | up | AW916976            | AW916976             | AW916976     |                     |        |              |
| A 44 P504261  | 1.03E-04 | 1.70E-03 | 2.28 | up | NM 001014102        | RGD1309930           | NM 001014102 | ENSRNOT00000021527  | 316426 | NM 001014102 |
| A 44 P543329  | 8.11E-03 | 1.71E-02 | 2.28 | up | ENSRNOT000000048485 | Havcr2               |              | ENSRNOT000000048485 | 363578 | NM 343881    |
| A 44 P1021361 | 5.49E-03 | 1.31E-02 | 2.28 | up | NM 198791           | Tlr3                 | NM 198791    |                     | 364594 | NM 198791    |
| A 44 P1028858 | 2.96E-04 | 2.62E-03 | 2.28 | up | NM 017113           | Grn                  | NM 017113    | ENSRNOT00000028557  | 29143  | NM 017113    |
| A 44 P506817  | 2.51E-02 | 3.72E-02 | 2.26 | up | BF287204            | BF287204             | BF287204     |                     |        |              |
| A 44 P336423  | 7.24E-03 | 1.56E-02 | 2.26 | up | XM 001065356        | LOC689959            | XM 001065356 |                     | 689959 | XM 001065356 |
| A 44 P236588  | 2.30E-02 | 3.49E-02 | 2.25 | up | NM 001011559        | Trpm2                | NM 001011559 | ENSRNOT00000001631  | 294329 | NM 001011559 |
| A 42 P457756  | 3.65E-03 | 1.01E-02 | 2.25 | up | NM 012627           | Pkib                 | NM 012627    | ENSRNOT00000001075  | 24678  | NM 012627    |
| A 44 P428420  | 2.64E-03 | 8.42E-03 | 2.24 | up | NM 183330           | Ctsh                 | NM 183330    |                     | 252929 | NM 183330    |
| A 44 P384404  | 3.61E-03 | 1.00E-02 | 2.24 | up | ENSRNOT000000033795 | Msa411_predicted     |              | ENSRNOT000000033795 | 361735 | XM 342028    |
| A 43 P13117   | 7.87E-04 | 4.04E-03 | 2.24 | up | NM 130421           | Lcp2                 | NM 130421    | ENSRNOT00000007784  | 155918 | NM 130421    |
| A 44 P545727  | 6.63E-04 | 3.77E-03 | 2.23 | up | ENSRNOT00000003984  | Fin29                |              | ENSRNOT00000003984  | 114635 | XM 341086    |
| A 44 P540511  | 1.46E-02 | 2.51E-02 | 2.23 | up | NM 012627           | Pkib                 | NM 012627    | ENSRNOT00000057363  | 24678  | NM 012627    |
| A 44 P1039616 | 1.70E-03 | 6.24E-03 | 2.23 | up | XM 213514           | RGD1559482_predicted | XM 213514    |                     | 498022 | XM 213514    |
| A 44 P340587  | 9.86E-04 | 4.47E-03 | 2.22 | up | CB548303            | CB548303             | CB548303     |                     |        |              |
| A 44 P514939  | 4.38E-03 | 1.13E-02 | 2.22 | up | NM 012515           | Bzrp                 | NM 012515    | ENSRNOT00000014089  | 24230  | NM 012515    |
| A 44 P567198  | 3.56E-02 | 4.78E-02 | 2.21 | up | CB750248            | CB750248             | CB750248     |                     |        |              |
| A 43 P10692   | 6.35E-04 | 3.69E-03 | 2.21 | up | TC618651            | TC618651             |              |                     |        |              |
| A 44 P473098  | 2.49E-03 | 8.13E-03 | 2.21 | up | ENSRNOT000000031129 | ENSRNOT000000031129  |              | ENSRNOT000000031129 |        | XM 001055174 |
| A 42 P622574  | 6.47E-04 | 3.71E-03 | 2.20 | up | NM 080891           | Daxx                 | NM 080891    | ENSRNOT00000000559  | 140926 | NM 080891    |
| A 44 P425298  | 9.62E-03 | 1.91E-02 | 2.20 | up | AI009142            | AI009142             | AI009142     |                     |        |              |
| A 44 P381493  | 3.52E-02 | 4.78E-02 | 2.20 | up | AI407758            | AI407758             | AI407758     |                     |        |              |
| A 44 P433783  | 1.59E-03 | 6.00E-03 | 2.20 | up | NM 001005892        | Sgpi1                | NM 001005892 | ENSRNOT00000016306  | 366126 | NM 001005892 |
| A 44 P321544  | 2.91E-02 | 4.14E-02 | 2.20 | up | ENSRNOT000000011572 | Slc41a2_predicted    |              | ENSRNOT000000011572 | 362861 | XM 343191    |
| A 44 P879764  | 6.81E-04 | 3.80E-03 | 2.19 | up | ENSRNOT000000010874 | B4ga11_predicted     |              | ENSRNOT000000010874 | 24390  | XM 342820    |
| A 42 P570241  | 3.52E-04 | 2.81E-03 | 2.19 | up | NM 177928           | Pbe1f                | NM 177928    | ENSRNOT00000013043  | 297508 | NM 177928    |
| A 44 P573545  | 3.62E-02 | 4.84E-02 | 2.18 | up | BF290411            | BF290411             | BF290411     |                     |        |              |
| A 43 P19712   | 1.12E-02 | 2.12E-02 | 2.18 | up | ENSRNOT00000005055  | Cpr65_predicted      |              | ENSRNOT00000005055  | 299242 | XM 234367    |
| A 44 P123158  | 2.83E-03 | 8.71E-03 | 2.18 | up | AA965150            | AA965150             | AA965150     |                     |        |              |
| A 44 P104630  | 7.18E-03 | 1.56E-02 | 2.17 | up | NM 173840           | Lat2                 | NM 173840    | ENSRNOT00000034629  | 317676 | NM 173840    |
| A 44 P652323  | 4.83E-03 | 1.19E-02 | 2.17 | up | NM 575856           | RGD1565225_predicted | NM 575856    | ENSRNOT00000042597  | 500491 | XM 575856    |
| A 44 P1041312 | 1.41E-02 | 2.46E-02 | 2.17 | up | ENSRNOT000000016032 | RGD1564385_predicted |              | ENSRNOT000000016032 | 361597 | XM 341876    |
| A 44 P353978  | 1.69E-03 | 6.24E-03 | 2.17 | up | XM 345064           | XM 345064            | XM 345064    |                     |        |              |
| A 44 P355928  | 6.00E-03 | 1.40E-02 | 2.16 | up | NM 017320           | Ciss                 | NM 017320    | ENSRNOT00000056333  | 50654  | NM 017320    |
| A 44 P1053404 | 2.77E-03 | 8.68E-03 | 2.15 | up | XM 001053627        | LOC498279            | XM 001053627 |                     | 498279 | XM 001053627 |
| A 44 P183488  | 2.93E-04 | 2.62E-03 | 2.15 | up | NM 022260           | Casp7                | NM 022260    | ENSRNOT00000022693  | 64026  | NM 022260    |
| A 44 P469531  | 1.35E-02 | 2.40E-02 | 2.15 | up | NM 031537           | LOC24906             | NM 031537    | ENSRNOT00000003797  | 24906  | NM 031537    |
| A 44 P554698  | 2.46E-04 | 2.44E-03 | 2.15 | up | NM 017257           | Psm2                 | NM 017257    | ENSRNOT00000026279  | 29614  | NM 017257    |
| A 44 P461343  | 2.37E-02 | 3.57E-02 | 2.14 | up | NM 031528           | Rara                 | NM 031528    | ENSRNOT00000008659  | 54705  | NM 031528    |
| A 43 P12080   | 3.60E-02 | 4.83E-02 | 2.14 | up | NM 021585           | Mca32                | NM 021585    |                     | 59105  | NM 021585    |
| A 44 P426986  | 2.31E-02 | 3.50E-02 | 2.14 | up | ENSRNOT00000005685  | Zbtb39_predicted     |              | ENSRNOT00000005685  | 299510 | XM 234781    |
| A 42 P607092  | 9.04E-03 | 1.83E-02 | 2.13 | up | NM 001011987        | Glior1               | NM 001011987 | ENSRNOT00000005399  | 299783 | NM 001011987 |
| A 44 P698940  | 5.71E-03 | 1.34E-02 | 2.13 | up | ENSRNOT000000018640 | ENSRNOT000000018640  |              | ENSRNOT000000018640 |        | XM 001055675 |
| A 42 P781919  | 3.22E-03 | 9.44E-03 | 2.13 | up | NM 019262           | C1qb                 | NM 019262    | ENSRNOT00000017060  | 29687  | NM 019262    |
| A 44 P233907  | 8.64E-04 | 4.26E-03 | 2.13 | up | ENSRNOT000000042906 | ENSRNOT000000042906  |              | ENSRNOT000000042906 |        | XM 001057149 |
| A 42 P577482  | 1.96E-02 | 3.08E-02 | 2.13 | up | BM387057            | BM387057             | BM387057     |                     |        |              |
| A 44 P781764  | 5.53E-03 | 1.31E-02 | 2.12 | up | XM 234471           | Rin3_predicted       | XM 234471    |                     | 314397 | XM 001066908 |
| A 44 P222004  | 3.53E-02 | 4.78E-02 | 2.12 | up | NM 013129           | Il15                 | NM 013129    | ENSRNOT00000004590  | 25670  | NM 013129    |
| A 44 P1033435 | 1.18E-02 | 2.19E-02 | 2.11 | up | NM 001004021        | Kat13                | NM 001004021 | ENSRNOT00000018851  | 287699 | NM 001004021 |
| A 42 P824217  | 1.17E-02 | 2.18E-02 | 2.11 | up | ENSRNOT000000014139 | Dapp1_predicted      |              | ENSRNOT000000014139 | 362046 | XM 342348    |
| A 44 P1052067 | 3.31E-03 | 9.52E-03 | 2.11 | up | NM 199101           | Plekha4              | NM 199101    |                     | 308584 | NM 199101    |
| A 44 P1036091 | 3.87E-04 | 2.92E-03 | 2.11 | up | NM 001001517        | Zfp313               | NM 001001517 | ENSRNOT00000012675  | 362277 | NM 001001517 |
| A 44 P141992  | 6.71E-04 | 3.78E-03 | 2.11 | up | NM 017335           | Slc6a12              | NM 017335    | ENSRNOT00000018821  | 50676  | NM 017335    |
| A 42 P726091  | 2.32E-02 | 3.51E-02 | 2.11 | up | BX883048            | BX883048             | BX883048     |                     |        |              |
| A 44 P286788  | 3.56E-03 | 9.96E-03 | 2.11 | up | ENSRNOT00000009544  | LOC500904            |              | ENSRNOT00000009544  | 500904 | XM 576306    |
| A 44 P809374  | 3.71E-02 | 4.96E-02 | 2.10 | up | NM 207615           | Cicr1                | NM 207615    | ENSRNOT00000025342  | 363595 | NM 207615    |
| A 44 P886515  | 1.29E-03 | 5.28E-03 | 2.10 | up | TC634445            | TC634445             |              |                     |        |              |
| A 44 P466118  | 2.50E-03 | 8.15E-03 | 2.09 | up | NM 001031658        | Slc11a1              | NM 001031658 | ENSRNOT00000057472  | 316519 | NM 001031658 |
| A 43 P17016   | 3.76E-03 | 1.03E-02 | 2.09 | up | ENSRNOT000000024018 | Unc93b1              |              | ENSRNOT00000024018  | 361689 | XM 341972    |
| A 44 P1001628 | 1.55E-03 | 5.95E-03 | 2.09 | up | BC061859            | Tcirg1               | BC061859     | ENSRNOT00000023425  | 293650 | NM 001001628 |
| A 44 P766913  | 2.01E-02 | 3.14E-02 | 2.09 | up | CO570092            | CO570092             | CO570092     |                     |        |              |
| A 44 P429494  | 3.97E-03 | 1.06E-02 | 2.08 | up | AA818132            | AA818132             | AA818132     |                     |        |              |
| A 43 P15253   | 4.16E-03 | 1.09E-02 | 2.08 | up | NM 012967           | Icam1                | NM 012967    | ENSRNOT00000028066  | 25464  | NM 012967    |
| A 42 P817228  | 5.03E-04 | 3.25E-03 | 2.08 | up | NM 001004260        | Slc22a18             | NM 001004260 | ENSRNOT00000027925  | 309131 | NM 001004260 |
| A 44 P463888  | 2.71E-02 | 3.94E-02 | 2.07 | up | ENSRNOT000000027622 | Hdac4_predicted      |              | ENSRNOT000000027622 | 363287 | XM 343629    |
| A 44 P559366  | 1.04E-02 | 2.02E-02 | 2.07 | up | AW914472            | AW914472             | AW914472     |                     |        |              |
| A 44 P547954  | 2.79E-02 | 4.00E-02 | 2.07 | up | NR 002155           | RT1-CE6              | NR 002155    |                     | 415073 | NR 002155    |
| A 44 P283839  | 1.80E-02 | 2.92E-02 | 2.07 | up | A 44 P283839        |                      |              |                     |        |              |
| A 44 P730282  | 1.36E-03 | 5.50E-03 | 2.07 | up | DV724088            | DV724088             | DV724088     |                     |        |              |
| A 44 P975347  | 1.33E-04 | 1.88E-03 | 2.06 | up | TC582893            | TC582893             |              |                     |        |              |
| A 44 P489862  | 2.21E-03 | 7.42E-03 | 2.06 | up | NM 001014039        | Tnfrap82             | NM 001014039 | ENSRNOT00000028642  | 310663 | NM 001014039 |
| A 44 P227010  | 1.72E-02 | 2.82E-02 | 2.06 | up | ENSRNOT000000032439 | RGD1306181_predicted |              | ENSRNOT000000032439 | 308346 | XM 218223    |
| A 44 P650867  | 1.78E-03 | 6.34E-03 | 2.06 | up | AW917197            | AW917197             | AW917197     |                     |        |              |
| A 44 P610991  | 2.14E-03 | 7.25E-03 | 2.05 | up | TC649236            | TC649236             |              |                     |        |              |
| A 44 P787598  | 1.02E-03 | 4.54E-03 | 2.05 | up | AW915403            | AW915403             | AW915403     |                     |        |              |
| A 43 P17471   | 7.33E-04 | 3.84E-03 | 2.04 | up | ENSRNOT000000019392 | Chac1_predicted      |              | ENSRNOT000000019392 | 362196 | XM 342497    |
| A 44 P529240  | 3.56E-02 | 4.78E-02 | 2.04 | up | NM 183054           | Rhbg                 | NM 183054    | ENSRNOT00000026396  | 310625 | NM 183054    |
| A 44 P415193  | 1.84E-03 | 6.42E-03 | 2.04 | up | NM 001033703        | Apobec3              | NM 001033703 | ENSRNOT000000037134 | 315137 | NM 001033703 |
| A 44 P348922  | 3.45E-04 | 2.81E-03 | 2.04 | up | NM 024125           | Cebp2                | NM 024125    | ENSRNOT000000030773 | 24253  | NM 024125    |
| A 44 P477650  | 5.63E-04 | 3.45E-03 | 2.04 | up | NM 020101           | Cenla2               | NM 020101    | ENSRNOT00000005418  | 56826  | NM 020101    |
| A 44 P145562  | 2.48E-02 | 3.70E-02 | 2.04 | up | XM 001068649        | Dock2                | XM 001068649 | ENSRNOT00000009524  | 365059 | XM 001068649 |
| A 44 P356876  | 6.72E-04 | 3.78E-03 | 2.04 | up | NM 001039002        | RGD1304790           | NM 001039002 | ENSRNOT00000002355  | 288031 | NM 001039002 |
| A 43 P19806   | 8.40E-03 | 1.75E-02 | 2.03 | up | XM 341175           | XM 341175            | XM 341175    |                     |        |              |
| A 44 P152144  | 1.20E-03 | 5.03E-03 | 2.03 | up | NM 001025637        | Psmb10               | NM 001025637 | ENSRNOT00000026462  | 291983 | NM 001025637 |
| A 44 P202940  | 1.07E-02 | 2.06E-02 | 2.02 | up | AI171966            | AI171966             | AI171966     |                     |        |              |
| A 44 P289941  | 1.92E-02 | 3.04E-02 | 2.02 | up | AA925160            | AA925160             | AA925160     |                     |        |              |
| A 44 P129869  |          |          |      |    |                     |                      |              |                     |        |              |
