# Supplementary material
Source: PubMed Central journal article supplement (PMC11113786)
Supplement: 18_2013_1402_MOESM4_ESM.pdf [file 18_2013_1402_MOESM4_ESM.pdf]

**Table S2. Up-regulated genes in BDV infected Lewis stice cultures.** Genes induced more than 2-fold at 23 days post infection are listed

| Gene ID       | p-value  | Corrected p-value | FCAbsolute | regulation | Common name        | GeneSymbol           | GenbankAccession | EnsemblID           | EntrezGene | RefSeq       |
|---------------|----------|-------------------|------------|------------|--------------------|----------------------|------------------|---------------------|------------|--------------|
| A 44 P283726  | 2.93E-05 | 1.03E-03          | 338.62     | up         | NM 001007694       | Ifi3                 | NM 001007694     | ENSRNOT00000031025  | 309526     | NM 001007694 |
| A 44 P294675  | 1.00E-04 | 1.94E-03          | 257.60     | up         | NM 003687          | Sifn3                | NM 053687        | ENSRNOT00000012859  | 114247     | NM 003687    |
| A 44 P391672  | 2.09E-06 | 4.43E-04          | 178.18     | up         | ENSRNOT00000028855 | ENSRNOT00000028855   |                  | ENSRNOT00000028855  |            | XM 230608    |
| A 44 P279340  | 8.54E-06 | 6.25E-04          | 109.60     | up         | NM 138913          | Oas1                 | NM 138913        | ENSRNOT00000038426  | 192281     | NM 138913    |
| A 44 P196172  | 3.57E-06 | 4.62E-04          | 109.04     | up         | NM 138881          | Bes5f                | NM 138881        | ENSRNOT00000010092  | 65190      | NM 138881    |
| A 44 P428642  | 3.87E-05 | 1.19E-03          | 105.11     | up         | AJ302054           | Zbp1                 | AJ302054         | ENSRNOT00000008365  | 171091     | XM 342594    |
| A 44 P226999  | 1.17E-05 | 7.25E-04          | 104.97     | up         | NM 001009680       | Oas1i                | NM 001009680     | ENSRNOT00000043279  | 304507     | NM 001009680 |
| A 44 P492025  | 2.88E-06 | 4.43E-04          | 100.52     | up         | NM 001009681       | Oas1i                | NM 001009681     | ENSRNOT00000001570  | 304545     | NM 001009681 |
| A 44 P1039994 | 2.51E-06 | 4.43E-04          | 93.99      | up         | NM 001033691       | Irf7                 | NM 001033691     | ENSRNOT000000023504 | 293624     | NM 001033691 |
| A 44 P284200  | 1.39E-06 | 4.43E-04          | 77.83      | up         | NM 001014058       | Usp18                | NM 001014058     |                     | 312688     | NM 001014058 |
| A 44 P157229  | 4.47E-06 | 4.62E-04          | 75.43      | up         | NM 001014058       | Usp18                | NM 001014058     |                     | 312688     | NM 001014058 |
| A 44 P1013314 | 2.61E-05 | 1.02E-03          | 69.57      | up         | ENSRNOT00000039263 | G1p2 predicted       |                  | ENSRNOT00000039263  | 298693     | XM 216605    |
| A 44 P975601  | 1.43E-05 | 7.92E-04          | 54.22      | up         | NM 001014235       | LOC364393            | NM 001014235     |                     | 364393     | NM 001014235 |
| A 44 P696994  | 3.02E-06 | 4.43E-04          | 54.11      | up         | NM 001024753       | Ifi2                 | NM 001024753     | ENSRNOT000000054757 | 294091     | NM 001024753 |
| A 44 P932042  | 1.77E-03 | 7.77E-03          | 49.31      | up         | BF544728           | BF544728             | BF544728         |                     |            |              |
| A 44 P532270  | 1.55E-04 | 2.37E-03          | 46.94      | up         | ENSRNOT00000031023 | Herc6                |                  | ENSRNOT00000031023  | 362376     | XM 342700    |
| A 44 P832019  | 1.20E-04 | 2.04E-03          | 40.41      | up         | NM 001014235       | LOC364393            | NM 001014235     |                     | 364393     | NM 001014235 |
| A 43 P14036   | 1.25E-04 | 2.07E-03          | 39.86      | up         | NM 206846          | isg12(b)             | NM 206846        |                     | 299269     | NM 206846    |
| A 44 P370190  | 4.19E-05 | 1.23E-03          | 39.24      | up         | NM 138881          | Bes5f                | NM 138881        | ENSRNOT00000010092  | 65190      | NM 138881    |
| A 44 P1057055 | 2.16E-03 | 8.58E-03          | 37.85      | up         | NM 213425          | Ccl12 predicted      | XM 213425        |                     | 287562     | NM 213425    |
| A 42 P736315  | 1.97E-04 | 2.72E-03          | 37.64      | up         | ENSRNOT00000043660 | Rtp4 predicted       |                  | ENSRNOT00000043660  | 360733     | XM 001056345 |
| A 44 P423691  | 3.01E-04 | 3.23E-03          | 37.09      | up         | NM 012976          | Lgals5               | NM 012976        | ENSRNOT00000016897  | 25475      | NM 012976    |
| A 44 P212964  | 6.75E-05 | 1.65E-03          | 36.44      | up         | ENSRNOT0000003012  | Plac8 predicted      |                  | ENSRNOT0000003012   | 360914     | NM 341188    |
| A 42 P565621  | 1.82E-04 | 2.61E-03          | 36.41      | up         | ENSRNOT00000010594 | Slamf9 predicted     |                  | ENSRNOT00000010594  | 289235     | NM 213932    |
| A 44 P393679  | 4.47E-07 | 4.12E-04          | 35.83      | up         | XM 222950          | RGD1562462 predicted | XM 222950        |                     | 289245     | NM 222950    |
| A 44 P306930  | 8.23E-06 | 6.25E-04          | 32.94      | up         | ENSRNOT00000036512 | LOC684383            |                  | ENSRNOT00000036512  | 684383     | NM 001072319 |
| A 44 P187530  | 1.18E-04 | 2.02E-03          | 31.36      | up         | NM 001008858       | RT1-T24-1            | NM 001008858     |                     | 361787     | NM 001008858 |
| A 44 P199187  | 7.01E-05 | 1.67E-03          | 28.27      | up         | NM 001012353       | MGC108823            | NM 001012353     |                     | 307414     | NM 001012353 |
| A 44 P422880  | 1.51E-05 | 7.92E-04          | 28.26      | up         | AI045512           | AI045512             | AI045512         |                     |            |              |
| A 44 P410016  | 4.53E-05 | 1.31E-03          | 27.19      | up         | NM 001024753       | Ifi2                 | NM 001024753     | ENSRNOT000000054757 | 294091     | NM 001024753 |
| A 44 P973681  | 1.60E-05 | 7.99E-04          | 26.65      | up         | AW141066           | AW141066             | AW141066         |                     |            |              |
| A 44 P1039128 | 2.10E-03 | 8.47E-03          | 24.43      | up         | NM 139089          | Cxcl10               | NM 139089        | ENSRNOT00000003075  | 245920     | NM 139089    |
| A 44 P123926  | 1.55E-05 | 7.96E-04          | 24.31      | up         | NM 227820          | LOC310968            | XM 227820        |                     | 310968     | XM 227820    |
| A 44 P126061  | 1.94E-05 | 9.28E-04          | 23.33      | up         | NM 001009682       | Oas2                 | NM 001009682     | ENSRNOT00000001600  | 300459     | NM 001009682 |
| A 44 P214846  | 3.73E-07 | 4.12E-04          | 23.20      | up         | NM 134350          | Mx2                  | NM 134350        | ENSRNOT00000002895  | 286818     | NM 134350    |
| A 44 P180431  | 2.15E-05 | 9.36E-04          | 21.46      | up         | ENSRNOT00000036512 | LOC684383            |                  | ENSRNOT00000036512  | 684383     | NM 001072319 |
| A 44 P444610  | 2.19E-05 | 9.36E-04          | 21.27      | up         | BF284803           | BF284803             | BF284803         |                     |            |              |
| A 44 P110352  | 8.31E-05 | 1.80E-03          | 20.80      | up         | ENSRNOT00000032512 | ENSRNOT00000032512   |                  | ENSRNOT00000032512  |            |              |
| A 43 P15536   | 1.49E-05 | 7.92E-04          | 20.18      | up         | NM 019127          | Ifnb1                | NM 019127        | ENSRNOT00000008224  | 24481      | NM 019127    |
| A 44 P534349  | 2.68E-05 | 1.02E-03          | 19.78      | up         | XM 224738          | XM 224738            | XM 224738        |                     |            |              |
| A 44 P1029397 | 2.25E-04 | 2.92E-03          | 19.53      | up         | NM 198134          | Bst2                 | NM 198134        | ENSRNOT00000038494  | 378947     | NM 198134    |
| A 42 P661992  | 8.18E-05 | 1.80E-03          | 19.38      | up         | XM 001075548       | LOC690768            | XM 001075548     |                     | 690768     | NM 001075058 |
| A 44 P373660  | 1.36E-05 | 7.92E-04          | 19.00      | up         | AI408440           | AI408440             | AI408440         |                     |            |              |
| A 44 P454420  | 1.09E-04 | 2.00E-03          | 18.91      | up         | AF029241           | RT1-S3               | AF029241         |                     | 294228     |              |
| A 42 P504653  | 9.88E-04 | 5.67E-03          | 18.89      | up         | NM 017143          | F10                  | NM 017143        | ENSRNOT00000026677  | 29243      | NM 017143    |
| A 44 P423641  | 8.59E-05 | 1.81E-03          | 18.42      | up         | NM 012977          | Lgals9               | NM 012977        | ENSRNOT00000017071  | 25476      | NM 012977    |
| A 44 P328136  | 6.97E-05 | 1.67E-03          | 18.31      | up         | NM 173096          | Mx1                  | NM 173096        | ENSRNOT00000039876  | 24575      | NM 173096    |
| A 44 P317250  | 3.59E-04 | 3.54E-03          | 18.23      | up         | AA819034           | AA819034             | AA819034         |                     |            |              |
| A 44 P981153  | 3.51E-03 | 1.12E-02          | 18.19      | up         | CO562477           | CO562477             | CO562477         |                     |            |              |
| A 44 P150017  | 8.84E-05 | 1.81E-03          | 18.01      | up         | TC582911           | TC582911             | TC582911         |                     |            |              |
| A 44 P1020615 | 1.35E-06 | 4.43E-04          | 17.90      | up         | ENSRNOT00000029990 | Ifi44                |                  | ENSRNOT00000029990  | 310969     | XM 227821    |
| A 44 P1029403 | 2.82E-04 | 3.21E-03          | 17.30      | up         | NM 198134          | Bst2                 | NM 198134        | ENSRNOT00000036276  | 378947     | NM 198134    |
| A 44 P901471  | 4.77E-06 | 4.62E-04          | 17.23      | up         | TC594336           | TC594336             | TC594336         |                     |            |              |
| A 44 P1020608 | 5.18E-06 | 4.62E-04          | 16.86      | up         | ENSRNOT00000029990 | Ifi44                |                  | ENSRNOT00000029990  | 310969     | XM 227821    |
| A 44 P407771  | 2.35E-06 | 4.43E-04          | 16.82      | up         | ENSRNOT00000029990 | Ifi44                |                  | ENSRNOT00000029990  | 310969     | XM 227821    |
| A 43 P21799   | 2.16E-05 | 9.36E-04          | 16.38      | up         | ENSRNOT00000024718 | RGD1310093 predicted |                  | ENSRNOT00000024718  | 303538     | XM 220978    |
| A 44 P103411  | 1.06E-03 | 5.95E-03          | 15.74      | up         | BM385476           | BM385476             | BM385476         |                     |            |              |
| A 42 P557394  | 6.03E-07 | 4.12E-04          | 15.57      | up         | NM 001008510       | Isq20                | NM 001008510     | ENSRNOT00000024826  | 293052     | NM 001008510 |
| A 44 P304323  | 4.43E-03 | 1.29E-02          | 15.50      | up         | NM 031116          | Ccl5                 | NM 031116        | ENSRNOT00000014865  | 81780      | NM 031116    |
| A 44 P299213  | 1.16E-05 | 7.25E-04          | 15.45      | up         | NM 203410          | Ifi271               | NM 203410        | ENSRNOT00000012296  | 170512     | NM 203410    |
| A 44 P444614  | 9.54E-05 | 1.88E-03          | 15.33      | up         | BF284803           | BF284803             | BF284803         |                     |            |              |
| A 44 P550785  | 1.65E-03 | 7.44E-03          | 14.89      | up         | ENSRNOT00000037399 | Gbp5 predicted       |                  | ENSRNOT00000037399  | 362050     | XM 342352    |
| A 44 P779731  | 5.51E-04 | 4.25E-03          | 13.97      | up         | TC585855           | TC585855             | TC585855         |                     |            |              |
| A 44 P768625  | 1.51E-04 | 2.33E-03          | 13.27      | up         | XM 001079971       | Ifi1 predicted       | XM 001079971     |                     | 294090     | NM 001079971 |
| A 43 P19776   | 3.12E-02 | 4.60E-02          | 11.49      | up         | XM 001060637       | LOC682243            | XM 001060637     |                     | 682243     | XM 001060637 |
| A 44 P528552  | 1.69E-06 | 4.43E-04          | 11.47      | up         | ENSRNOT00000052003 | Tyk1 predicted       |                  | ENSRNOT00000052003  | 314004     | XM 234017    |
| A 44 P18566   | 5.12E-03 | 1.41E-02          | 11.07      | up         | TC593044           | TC593044             | TC593044         |                     |            |              |
| A 42 P840729  | 2.62E-02 | 4.05E-02          | 10.90      | up         | DV725094           | DV725094             | DV725094         |                     |            |              |
| A 44 P1025349 | 1.73E-04 | 2.53E-03          | 10.84      | up         | ENSRNOT00000046483 | Ube11 predicted      |                  | ENSRNOT00000046483  | 301000     | XM 217252    |
| A 44 P156642  | 6.42E-05 | 1.60E-03          | 10.27      | up         | XM 218339          | RGD1304717 predicted | XM 218339        |                     | 308436     | XM 218339    |
| A 44 P179956  | 7.42E-04 | 5.05E-03          | 9.93       | up         | AY321344           | Igtp                 | AY321344         | ENSRNOT00000039335  | 303163     | NM 220451    |
| A 44 P192801  | 1.57E-03 | 7.32E-03          | 9.91       | up         | BF283485           | BF283485             | BF283485         |                     |            |              |
| A 44 P522318  | 1.67E-03 | 7.46E-03          | 9.85       | up         | NM 181476          | Gpr109a              | NM 181476        | ENSRNOT00000032249  | 353250     | NM 181476    |
| A 44 P174992  | 1.13E-03 | 6.06E-03          | 9.82       | up         | NM 172019          | Ifi47                | NM 172019        | ENSRNOT00000003343  | 246208     | NM 172019    |
| A 44 P259241  | 2.93E-04 | 3.21E-03          | 9.67       | up         | BI395793           | BI395793             | BI395793         |                     |            |              |
| A 44 P257893  | 1.42E-04 | 2.22E-03          | 9.65       | up         | ENSRNOT00000022648 | Gbp4 predicted       |                  | ENSRNOT00000022648  | 310917     | XM 227762    |
| A 44 P544063  | 4.23E-06 | 4.62E-04          | 9.65       | up         | NM 001012007       | Irgm                 | NM 001012007     | ENSRNOT00000045540  | 303090     | NM 001012007 |
| A 43 P11359   | 6.64E-04 | 4.74E-03          | 9.61       | up         | AW921109           | AW921109             | AW921109         |                     |            |              |
| A 42 P527724  | 1.99E-03 | 8.28E-03          | 9.42       | up         | NM 053634          | Fcnb                 | NM 053634        | ENSRNOT00000012494  | 114091     | NM 053634    |
| A 44 P163706  | 1.25E-04 | 2.07E-03          | 9.36       | up         | NM 001014235       | LOC364393            | NM 001014235     | ENSRNOT00000059475  | 364393     | NM 001014235 |
| A 44 P164512  | 5.11E-05 | 1.36E-03          | 9.36       | up         | NM 032612          | Stat1                | NM 032612        | ENSRNOT00000052121  | 25124      | NM 032612    |
| A 44 P793692  | 2.17E-04 | 2.88E-03          | 9.20       | up         | TC606133           | TC606133             | TC606133         |                     |            |              |
| A 44 P469113  | 2.30E-03 | 8.95E-03          | 9.20       | up         | ENSRNOT00000055957 | Sifn2 predicted      |                  | ENSRNOT00000055957  | 303380     | XM 220779    |
| A 42 P521707  | 1.59E-04 | 2.39E-03          | 9.02       | up         | L23128             | RT1-N3               | L23128           | ENSRNOT0000001035   | 24750      |              |
| A 44 P1053321 | 5.62E-04 | 4.26E-03          | 9.01       | up         | NM 133624          | Gbp2                 | NM 133624        | ENSRNOT0000001035   | 24750      |              |
| A 44 P332606  | 3.27E-03 | 1.08E-02          | 8.80       | up         | NM 172222          | C2                   | NM 172222        | ENSRNOT00000006067  | 24231      | NM 172222    |
| A 44 P1042473 | 1.09E-04 | 2.00E-03          | 8.77       | up         | NM 139096          | Lgals3bp             | NM 139096        | ENSRNOT00000004320  | 254955     | NM 139096    |
| A 44 P853254  | 4.74E-05 | 1.32E-03          | 8.59       | up         | TC600083           | TC600083             | TC600083         |                     |            |              |
| A 44 P175495  | 2.42E-02 | 3.83E-02          | 8.39       | up         | NM 182952          | Cxcl11               | NM 182952        | ENSRNOT00000031667  | 305236     | NM 182952    |
| A 44 P333384  | 5.51E-03 | 1.46E-02          | 8.34       | up         | NM 001024788       | RGD1310036           | NM 001024788     | ENSRNOT00000047309  | 316000     | NM 001024788 |
| A 44 P373236  | 2.22E-04 | 2.90E-03          | 8.30       | up         | NM 001013970       | Sifn8                | NM 001013970     | ENSRNOT00000055963  | 303378     | NM 001013970 |
| A 44 P933121  | 3.57E-03 | 1.14E-02          | 8.22       | up         | TC594767           | TC594767             | TC594767         |                     |            |              |
| A 44 P590748  | 8.31E-05 | 1.80E-03          | 8.16       | up         | ENSR               |                      |                  |                     |            |              |

|               |          |          |      |    |                     |                      |                     |                     |              |              |
|---------------|----------|----------|------|----|---------------------|----------------------|---------------------|---------------------|--------------|--------------|
| A 43 P19242   | 3.85E-03 | 1.19E-02 | 6.16 | up | ENSRNOT00000006680  | Glis2 predicted      | ENSRNOT00000006680  | 302946              | XM 220169    |              |
| A 44 P521505  | 1.01E-04 | 1.94E-03 | 6.07 | up | AA866448            | AA866448             | AA866448            |                     |              |              |
| A 43 P19238   | 1.31E-04 | 2.09E-03 | 6.03 | up | NM 001034137        | Sp110                | NM 001034137        | ENSRNOT00000056995  | 301570       | NM 001034137 |
| A 44 P337579  | 1.52E-03 | 7.24E-03 | 5.99 | up | NM 001008346        | RGD1308302           | NM 001008346        | ENSRNOT00000025651  | 308911       | NM 001008346 |
| A 44 P291395  | 4.73E-03 | 1.34E-02 | 5.95 | up | AI113042            | AI113042             | AI113042            |                     |              |              |
| A 42 P511265  | 9.06E-04 | 5.46E-03 | 5.91 | up | NM 001008845        | RT1-CE7              | NM 001008845        | ENSRNOT000000061109 | 368153       | NM 001008845 |
| A 44 P824698  | 3.89E-03 | 1.20E-02 | 5.89 | up | TC636178            | TC636178             | TC636178            |                     |              |              |
| A 42 P732259  | 4.31E-03 | 1.26E-02 | 5.87 | up | NM 001024976        | RGD1304835           | NM 001024976        | ENSRNOT00000057317  | 294430       | NM 001024976 |
| A 44 P299505  | 4.86E-03 | 1.36E-02 | 5.81 | up | AF147718            | LOC192182            | AF147718            |                     | 192182       |              |
| A 44 P342821  | 1.19E-03 | 6.25E-03 | 5.72 | up | NM 001025111        | Cd300f               | NM 001025111        | ENSRNOT00000039284  | 287818       | NM 001025111 |
| A 44 P286294  | 1.71E-02 | 3.03E-02 | 5.71 | up | XM 221185           | LOC303730            | XM 221185           |                     | 303730       | XM 221185    |
| A 44 P457548  | 5.58E-05 | 1.44E-03 | 5.70 | up | ENSRNOT00000030975  | Parp9 predicted      | ENSRNOT00000030975  | 303905              | XM 221404    |              |
| A 44 P501234  | 9.84E-04 | 5.67E-03 | 5.68 | up | NM 001008830        | RT1-A3               | NM 001008830        | ENSRNOT00000000544  | 309627       | NM 001008830 |
| A 44 P390172  | 2.61E-04 | 3.13E-03 | 5.67 | up | AJ004888            | RT1-Aw2              | AJ004888            |                     | 24737        |              |
| A 44 P324707  | 3.88E-04 | 3.70E-03 | 5.64 | up | NM 012645           | RT1-Aw2              | NM 012645           |                     | 24737        | NM 012645    |
| A 44 P1039634 | 3.33E-03 | 1.09E-02 | 5.63 | up | ENSRNOT00000017562  | Odf3 predicted       | ENSRNOT00000017562  | 365387              | XM 344975    |              |
| A 44 P261738  | 2.98E-03 | 1.01E-02 | 5.58 | up | BX883043            | BX883043             | BX883043            |                     |              |              |
| A 44 P801735  | 4.55E-03 | 1.31E-02 | 5.55 | up | AW918370            | AW918370             | AW918370            |                     |              |              |
| A 44 P274805  | 3.63E-03 | 1.15E-02 | 5.54 | up | NM 001025749        | Grap                 | NM 001025749        | ENSRNOT00000003515  | 363616       | NM 001025749 |
| A 44 P306439  | 4.75E-03 | 1.34E-02 | 5.53 | up | NM 207603           | Fcgr3a               | NM 207603           | ENSRNOT00000047434  | 304966       | NM 207603    |
| A 44 P346959  | 3.79E-05 | 1.19E-03 | 5.52 | up | NM 001012041        | lsfg3g               | NM 001012041        | ENSRNOT00000050853  | 305896       | NM 001012041 |
| A 44 P128151  | 2.40E-04 | 3.04E-03 | 5.47 | up | NM 001008886        | RT1-S3               | NM 001008886        | ENSRNOT000000061293 | 294228       | NM 001008886 |
| A 44 P960755  | 1.25E-03 | 6.38E-03 | 5.44 | up | TC596991            | TC596991             | TC596991            |                     |              |              |
| A 42 P660129  | 2.87E-04 | 3.21E-03 | 5.39 | up | NM 130422           | Casp12               | NM 130422           | ENSRNOT00000010243  | 156117       | NM 130422    |
| A 44 P254437  | 8.87E-03 | 1.95E-02 | 5.39 | up | BQ783109            | BQ783109             | BQ783109            |                     |              |              |
| A 44 P348614  | 3.41E-04 | 3.49E-03 | 5.37 | up | NM 001034137        | Sp110                | NM 001034137        | ENSRNOT00000056995  | 301570       | NM 001034137 |
| A 43 P15427   | 3.52E-04 | 3.52E-03 | 5.36 | up | NM 022670           | Sct                  | NM 022670           | ENSRNOT00000024094  | 24769        | NM 022670    |
| A 43 P10593   | 1.33E-04 | 2.09E-03 | 5.34 | up | NM 032612           | Stat1                | NM 032612           |                     | 25124        | NM 032612    |
| A 44 P301963  | 3.03E-04 | 3.24E-03 | 5.28 | up | NM 012708           | Psmb9                | NM 012708           | ENSRNOT00000000532  | 24967        | NM 012708    |
| A 44 P182020  | 1.06E-03 | 5.95E-03 | 5.27 | up | NM 080767           | Psmb8                | NM 080767           | ENSRNOT00000000528  | 24968        | NM 080767    |
| A 44 P180229  | 1.13E-03 | 6.06E-03 | 5.27 | up | XR 009137           | RGD1655457 predicted | XR 009137           |                     | 288589       | XR 009137    |
| A 44 P928367  | 1.46E-05 | 7.92E-04 | 5.26 | up | CV110972            | CV110972             | CV110972            |                     |              |              |
| A 44 P450075  | 6.53E-03 | 1.63E-02 | 5.19 | up | ENSRNOT00000054756  | lflit1 predicted     | ENSRNOT00000054756  | 294900              | XM 220058    |              |
| A 44 P536613  | 2.84E-03 | 9.78E-03 | 5.11 | up | NM 001025415        | Ch25h                | NM 001025415        | ENSRNOT00000025866  | 309527       | NM 001025415 |
| A 44 P325894  | 1.01E-03 | 5.78E-03 | 5.10 | up | XM 221916           | Zfp316 predicted     | XM 221916           | ENSRNOT00000038662  | 304293       | XM 221916    |
| A 44 P704966  | 6.31E-05 | 1.60E-03 | 5.09 | up | BI285978            | BI285978             | BI285978            |                     |              |              |
| A 44 P1022002 | 3.21E-02 | 4.70E-02 | 5.05 | up | NM 001007612        | Ccl7                 | NM 001007612        | ENSRNOT00000000256  | 287561       | NM 001007612 |
| A 44 P385319  | 4.51E-03 | 1.30E-02 | 5.02 | up | AA925708            | AA925708             | AA925708            |                     |              |              |
| A 44 P274061  | 4.01E-04 | 3.78E-03 | 4.95 | up | NM 001008841        | RT1-CE3              | NM 001008841        | ENSRNOT00000050099  | 414793       | NM 001008841 |
| A 44 P318466  | 5.67E-04 | 4.26E-03 | 4.94 | up | NM 001009536        | Trim25               | NM 001009536        |                     | 494338       | NM 001009536 |
| A 44 P855088  | 2.09E-03 | 8.47E-03 | 4.92 | up | TC602624            | TC602624             | TC602624            |                     |              |              |
| A 44 P566471  | 1.46E-02 | 2.74E-02 | 4.92 | up | BF287625            | BF287625             | BF287625            |                     |              |              |
| A 44 P992056  | 2.78E-03 | 9.64E-03 | 4.90 | up | NM 001024967        | Tmm106a              | NM 001024967        | ENSRNOT00000035523  | 287722       | NM 001024967 |
| A 44 P803484  | 5.65E-06 | 4.82E-04 | 4.88 | up | BG666368            | BG666368             | BG666368            |                     |              |              |
| A 44 P836120  | 2.84E-05 | 1.03E-03 | 4.87 | up | DV717880            | DV717880             | DV717880            |                     |              |              |
| A 44 P252935  | 1.92E-02 | 3.28E-02 | 4.85 | up | XM 223421           | XM 223421            | XM 223421           |                     |              |              |
| A 44 P252630  | 2.11E-05 | 9.36E-04 | 4.84 | up | NM 001047860        | RGD1306344           | NM 001047860        | ENSRNOT00000055127  | 296384       | NM 001047860 |
| A 44 P172850  | 1.07E-03 | 5.98E-03 | 4.73 | up | NM 001008843        | RT1-CE5              | NM 001008843        | ENSRNOT00000038495  | 309607       | NM 001008843 |
| A 44 P318778  | 7.28E-04 | 4.98E-03 | 4.72 | up | ENSRNOT00000055210  | Trim34 predicted     | ENSRNOT00000055210  | 293294              | XM 219045    |              |
| A 43 P17507   | 5.16E-06 | 4.62E-04 | 4.71 | up | BM386675            | BM386675             | BM386675            |                     |              |              |
| A 44 P462306  | 4.58E-04 | 3.93E-03 | 4.69 | up | CV115642            | CV115642             | CV115642            |                     |              |              |
| A 43 P10651   | 7.63E-05 | 1.74E-03 | 4.69 | up | BX883046            | BX883046             | BX883046            |                     |              |              |
| A 44 P391296  | 3.35E-02 | 4.84E-02 | 4.65 | up | NM 001007612        | Ccl7                 | NM 001007612        | ENSRNOT00000000256  | 287561       | NM 001007612 |
| A 44 P554925  | 4.17E-04 | 3.78E-03 | 4.63 | up | NM 206848           | RT1-CI               | NM 206848           | ENSRNOT00000041590  | 24977        | NM 206848    |
| A 43 P15252   | 6.03E-03 | 1.55E-02 | 4.61 | up | NM 012929           | Col2a1               | NM 012929           | ENSRNOT00000037840  | 25412        | NM 012929    |
| A 43 P21845   | 2.55E-02 | 3.99E-02 | 4.61 | up | NM 001014165        | RGD1310039           | NM 001014165        | ENSRNOT00000020464  | 361747       | NM 001014165 |
| A 44 P107372  | 5.30E-04 | 4.21E-03 | 4.58 | up | NM 001008840        | RT1-CE2              | NM 001008840        | ENSRNOT00000048076  | 414779       | NM 001008840 |
| A 44 P221168  | 6.99E-04 | 4.86E-03 | 4.57 | up | AF387339            | AF387339             | AF387339            |                     |              |              |
| A 44 P923554  | 6.24E-03 | 1.59E-02 | 4.55 | up | A 44 P923554        | A 44 P923554         | A 44 P923554        |                     |              |              |
| A 44 P173330  | 5.81E-03 | 1.51E-02 | 4.50 | up | NM 001024999        | RGD1307787           | NM 001024999        | ENSRNOT00000019130  | 307742       | NM 001024999 |
| A 44 P444001  | 4.43E-04 | 3.89E-03 | 4.49 | up | NM 001013430        | RhoH                 | NM 001013430        | ENSRNOT00000003425  | 305341       | NM 001013430 |
| A 44 P440517  | 2.77E-04 | 3.21E-03 | 4.48 | up | NM 001008842        | RT1-CE4              | NM 001008842        | ENSRNOT00000041151  | 414783       | NM 001008842 |
| A 44 P554917  | 4.82E-04 | 4.00E-03 | 4.47 | up | NM 206848           | RT1-CI               | NM 206848           |                     | 24977        | NM 206848    |
| A 44 P313661  | 4.50E-04 | 3.92E-03 | 4.46 | up | NM 001008835        | RT1-CE12             | NM 001008835        |                     | 309600       | NM 001008835 |
| A 44 P513029  | 4.11E-04 | 3.78E-03 | 4.44 | up | NM 001008832        | RT1-CE1              | NM 001008832        | ENSRNOT00000041917  | 309603       | NM 001008832 |
| A 44 P352828  | 2.55E-03 | 9.34E-03 | 4.44 | up | AW142930            | AW142930             | AW142930            |                     |              |              |
| A 44 P850918  | 1.24E-03 | 6.38E-03 | 4.43 | up | AW142569            | AW142569             | AW142569            |                     |              |              |
| A 44 P522847  | 4.16E-04 | 3.78E-03 | 4.41 | up | ENSRNOT00000017938  | Pik3ap1 predicted    | ENSRNOT00000017938  | 294048              | XM 220008    |              |
| A 44 P220696  | 2.79E-02 | 4.26E-02 | 4.39 | up | AA924993            | AA924993             | AA924993            |                     |              |              |
| A 42 P467037  | 2.51E-05 | 1.02E-03 | 4.34 | up | NM 019335           | Prkr                 | NM 019335           |                     | 54287        | NM 019335    |
| A 44 P296155  | 5.00E-04 | 4.10E-03 | 4.29 | up | NM 001008829        | RT1-A2               | NM 001008829        | ENSRNOT00000000544  | 24974        | NM 001008829 |
| A 44 P1037456 | 2.43E-03 | 9.17E-03 | 4.21 | up | XM 243609           | Col22a1 predicted    | XM 243609           |                     | 315071       | XM 001072793 |
| A 44 P520789  | 1.85E-02 | 3.20E-02 | 4.17 | up | ENSRNOT00000010217  | Rdh5 predicted       | ENSRNOT00000010217  |                     | 366791       | XM 345770    |
| A 44 P365611  | 2.31E-02 | 3.74E-02 | 4.17 | up | ENSRNOT000000060121 | Gpr31 predicted      | ENSRNOT000000060121 |                     | 292310       | XM 217867    |
| A 43 P23152   | 5.65E-04 | 4.26E-03 | 4.15 | up | NM 001013430        | RhoH                 | NM 001013430        | ENSRNOT00000003425  | 305341       | NM 001013430 |
| A 44 P531414  | 5.60E-03 | 1.47E-02 | 4.14 | up | AY077842            | Il18                 | AY077842            |                     | 29197        |              |
| A 44 P650867  | 1.11E-03 | 6.06E-03 | 4.12 | up | AW917197            | AW917197             | AW917197            |                     |              |              |
| A 44 P281510  | 1.91E-03 | 8.12E-03 | 4.12 | up | NM 001097582        | Tlr7 predicted       | ENSRNOT0000005620   | 317468              | NM 001097582 |              |
| A 44 P184753  | 6.04E-04 | 4.39E-03 | 4.11 | up | NM 001008829        | RT1-A2               | NM 001008829        | ENSRNOT00000000544  | 24974        | NM 001008829 |
| A 44 P867246  | 5.11E-04 | 4.15E-03 | 4.10 | up | NM 001008839        | RT1-CE16             | NM 001008839        |                     | 414819       | NM 001008839 |
| A 44 P523000  | 2.73E-04 | 3.19E-03 | 4.10 | up | XM 001080361        | LOC691960            | XM 001080361        |                     | 691960       | NM 001080361 |
| A 44 P325589  | 9.21E-04 | 5.52E-03 | 4.09 | up | NM 001000737        | Olrlf4 predicted     | NM 001000737        | ENSRNOT00000043047  | 404998       | NM 001000737 |
| A 44 P289637  | 5.57E-03 | 1.47E-02 | 4.00 | up | NM 012651           | Slc4a1               | NM 012651           | ENSRNOT00000028445  | 24779        | NM 012651    |
| A 44 P1042360 | 3.38E-02 | 4.87E-02 | 4.00 | up | XM 342752           | XM 342752            | XM 342752           |                     |              |              |
| A 42 P738549  | 2.36E-03 | 9.01E-03 | 4.00 | up | NM 031670           | Napsa                | NM 031670           | ENSRNOT00000026992  | 60575        | NM 031670    |
| A 43 P13451   | 2.20E-03 | 8.69E-03 | 3.98 | up | NM 223399           | RGD1562438 predicted | XM 223399           |                     | 305338       | XM 223399    |
| A 43 P22739   | 1.03E-03 | 5.82E-03 | 3.97 | up | XM 576974           | RGD1565785 predicted | XM 576974           |                     | 501570       | XM 001061435 |
| A 44 P132392  | 1.66E-03 | 7.45E-03 | 3.97 | up | AI011757            | AI011757             | AI011757            |                     |              |              |
| A 44 P679072  | 6.95E-03 | 1.68E-02 | 3.97 | up | AA997015            | AA997015             | AA997015            |                     |              |              |
| A 43 P21873   | 2.28E-03 | 8.93E-03 | 3.96 | up | ENSRNOT00000023497  | RGD1311859 predicted | ENSRNOT00000023497  | 303534              | XM 220974    |              |
| A 44 P183142  | 6.04E-03 | 1.55E-02 | 3.95 | up | NM 343286           | XM 343286            | XM 343286           |                     |              |              |
| A 44 P196401  | 1.04E-03 | 5.86E-03 | 3.95 | up | Y13890              | RT1-Aw2              | Y13890              |                     | 24737        |              |
| A 44 P450284  | 7.81E-04 | 5.13E-03 | 3.95 | up | NM 227986           | XM 227986            | NM 227986           |                     |              |              |
| A 44 P253059  | 1.90E-04 | 2.64E-03 | 3.94 | up | ENSRNOT00000018061  | LOC310756            | ENSRNOT00000018061  | 310756              | XM 227549    |              |
| A 44 P255817  | 1.23E-02 | 2.43E-02 | 3.92 | up | ENSRNOT00000060002  | RGD1564330 predicted | ENSRNOT00000060002  | 362848              | XM 343179    |              |
| A 44 P313652  | 1.78E-04 | 2.57E-03 | 3.91 | up | M10094              | RT1-Aw2              | M10094              |                     | 24737        |              |
| A 44 P578654  | 1.82E-02 | 3.17E-02 | 3.85 | up |                     |                      |                     |                     |              |              |

|               |          |          |      |    |                     |                      |              |                     |        |  |              |  |  |
|---------------|----------|----------|------|----|---------------------|----------------------|--------------|---------------------|--------|--|--------------|--|--|
| A 43 P15022   | 1.14E-02 | 2.31E-02 | 3.57 | up | CB315872            | CB315872             | CB315872     |                     |        |  |              |  |  |
| A 44 P557444  | 1.73E-03 | 7.68E-03 | 3.57 | up | NP798074            | NP798074             |              |                     |        |  |              |  |  |
| A 44 P421727  | 4.00E-03 | 1.22E-02 | 3.55 | up | XM 001073551        | Card11_predicted     | XM 001073551 | ENSRNOT00000051382  | 304314 |  | XM 001073551 |  |  |
| A 44 P213903  | 2.09E-02 | 3.46E-02 | 3.55 | up | BG380118            | BG380118             | BG380118     |                     |        |  |              |  |  |
| A 44 P324164  | 1.98E-02 | 3.35E-02 | 3.54 | up | ENSRNOT00000028277  | LOC688204            |              | ENSRNOT00000028277  | 688204 |  | XM 001061779 |  |  |
| A 44 P260406  | 1.48E-02 | 2.76E-02 | 3.53 | up | XM 344723           | XM 344723            | XM 344723    |                     |        |  |              |  |  |
| A 44 P438117  | 1.54E-02 | 2.83E-02 | 3.52 | up | NM 019336           | Rgs1                 | NM 019336    | ENSRNOT00000005251  | 54289  |  | NM 019336    |  |  |
| A 44 P333266  | 6.80E-03 | 1.67E-02 | 3.51 | up | NM 001024878        | Znr4                 | NM 001024878 |                     | 301127 |  | XM 001024878 |  |  |
| A 44 P140358  | 1.84E-03 | 7.90E-03 | 3.50 | up | ENSRNOT00000008961  | Samhd1_predicted     |              | ENSRNOT00000008961  | 311580 |  | XM 230789    |  |  |
| A 44 P106053  | 1.26E-04 | 2.07E-03 | 3.49 | up | Ai575648            | Ai575648             | Ai575648     |                     |        |  |              |  |  |
| A 43 P17139   | 4.76E-05 | 1.32E-03 | 3.49 | up | NM 001009625        | lfl35                | NM 001009625 | ENSRNOT00000028067  | 287719 |  | NM 001009625 |  |  |
| A 44 P165588  | 7.28E-03 | 1.73E-02 | 3.47 | up | NM 001003710        | Gpr77                | NM 001003710 |                     | 445269 |  | NM 001003710 |  |  |
| A 44 P281284  | 5.06E-03 | 1.40E-02 | 3.47 | up | ENSRNOT000000032301 | RGD1310185_predicted |              | ENSRNOT000000032301 | 313790 |  | XM 233749    |  |  |
| A 44 P426478  | 1.97E-02 | 3.34E-02 | 3.47 | up | XM 239603           | XM 239603            | XM 239603    |                     |        |  |              |  |  |
| A 44 P440514  | 9.69E-04 | 5.63E-03 | 3.47 | up | NM 001008842        | RT1-CE4              | NM 001008842 | ENSRNOT00000041151  | 414783 |  | NM 001008842 |  |  |
| A 44 P112362  | 1.99E-03 | 8.28E-03 | 3.45 | up | NM 001009709        | MGC109491            | NM 001009709 | ENSRNOT00000029845  | 362334 |  | NM 001009709 |  |  |
| A 44 P124303  | 8.30E-03 | 1.88E-02 | 3.45 | up | NM 237361           | XM 237361            | NM 237361    |                     |        |  |              |  |  |
| A 44 P468258  | 7.11E-03 | 1.71E-02 | 3.45 | up | NM 012762           | Casp1                | NM 012762    | ENSRNOT00000009993  | 25166  |  | NM 012762    |  |  |
| A 44 P298210  | 4.72E-03 | 1.34E-02 | 3.44 | up | NM 022277           | Casp8                | NM 022277    | ENSRNOT00000016613  | 64044  |  | NM 022277    |  |  |
| A 44 P452222  | 2.51E-02 | 3.94E-02 | 3.43 | up | NM 001033998        | lflgal               | NM 001033998 | ENSRNOT00000024404  | 308995 |  | NM 001033998 |  |  |
| A 44 P538526  | 4.94E-03 | 1.38E-02 | 3.42 | up | DO336705            | Numb                 | DO336705     | ENSRNOT00000049481  | 29419  |  |              |  |  |
| A 44 P161233  | 3.96E-03 | 1.21E-02 | 3.42 | up | NM 019165           | lfl18                | NM 019165    | ENSRNOT00000013093  | 29197  |  | NM 019165    |  |  |
| A 44 P543329  | 4.31E-04 | 3.81E-03 | 3.42 | up | ENSRNOT000000048485 | Havcr2               |              | ENSRNOT000000048485 | 363578 |  | XM 343881    |  |  |
| A 44 P305694  | 1.92E-02 | 3.28E-02 | 3.41 | up | Ai412156            | Ai412156             | Ai412156     |                     |        |  |              |  |  |
| A 44 P592899  | 2.13E-04 | 2.85E-03 | 3.41 | up | CO558942            | CO558942             | CO558942     |                     |        |  | XM 001074636 |  |  |
| A 44 P588937  | 6.26E-04 | 4.51E-03 | 3.41 | up | AW142896            | AW142896             | AW142896     |                     |        |  |              |  |  |
| A 44 P182881  | 1.76E-03 | 7.73E-03 | 3.41 | up | NM 001013160        | Rnf36                | NM 001013160 | ENSRNOT000000023209 | 311373 |  | NM 001013160 |  |  |
| A 44 P574959  | 9.74E-03 | 2.07E-02 | 3.41 | up | NM 001044279        | LOC681694            | NM 001044279 |                     | 681694 |  | NM 001044279 |  |  |
| A 42 P698972  | 9.49E-05 | 1.88E-03 | 3.41 | up | NM 033098           | Tapbp                | NM 033098    | ENSRNOT000000044975 | 25217  |  | NM 033098    |  |  |
| DarkCorner    | 2.65E-03 | 9.48E-03 | 3.39 | up | DarkCorner          | DarkCorner           |              |                     |        |  |              |  |  |
| A 43 P19928   | 2.92E-02 | 4.40E-02 | 3.38 | up | BF565121            | BF565121             | BF565121     |                     |        |  |              |  |  |
| A 44 P427695  | 8.54E-05 | 1.81E-03 | 3.38 | up | NM 001009683        | Tor3a                | NM 001009683 | ENSRNOT000000005726 | 304884 |  | NM 001009683 |  |  |
| A 42 P728204  | 2.42E-02 | 3.83E-02 | 3.36 | up | NM 001034849        | Gimap1               | NM 001034849 | ENSRNOT00000059157  | 312312 |  | NM 001034849 |  |  |
| A 44 P160174  | 2.98E-03 | 1.01E-02 | 3.36 | up | Ai178629            | Ai178629             | Ai178629     |                     |        |  |              |  |  |
| A 44 P988400  | 4.08E-03 | 1.23E-02 | 3.35 | up | CF111186            | CF111186             | CF111186     |                     |        |  |              |  |  |
| A 44 P503096  | 1.03E-03 | 5.82E-03 | 3.35 | up | Ai237657            | Ai237657             | Ai237657     |                     |        |  |              |  |  |
| A 44 P429626  | 3.26E-02 | 4.74E-02 | 3.34 | up | AA923988            | AA923988             | AA923988     |                     |        |  |              |  |  |
| A 44 P304633  | 8.52E-04 | 5.34E-03 | 3.34 | up | XM 345238           | XM 345238            | XM 345238    |                     |        |  |              |  |  |
| A 44 P412998  | 3.49E-04 | 3.51E-03 | 3.32 | up | NM 001017467        | LOC362934            | NM 001017467 | ENSRNOT00000009333  | 362934 |  | NM 001017467 |  |  |
| A 44 P1048380 | 2.65E-03 | 9.48E-03 | 3.31 | up | ENSRNOT00000013586  | RGD1311381_predicted |              | ENSRNOT00000013586  | 300870 |  | XM 217218    |  |  |
| A 44 P652323  | 1.56E-03 | 7.31E-03 | 3.31 | up | NM 575856           | RGD1655225_predicted | XM 575856    | ENSRNOT00000042597  | 500491 |  | XM 575856    |  |  |
| A 43 P21634   | 3.92E-03 | 1.20E-02 | 3.31 | up | NM 031504           | C4a                  | NM 031504    | ENSRNOT000000031704 | 24233  |  | NM 031504    |  |  |
| A 44 P1021361 | 1.81E-03 | 7.84E-03 | 3.30 | up | NM 198791           | Tr3                  | NM 198791    |                     | 364594 |  | NM 198791    |  |  |
| A 42 P480723  | 2.59E-03 | 9.38E-03 | 3.30 | up | NM 031539           | Cdb8                 | NM 031539    |                     | 24931  |  | NM 031539    |  |  |
| A 44 P270109  | 1.28E-02 | 2.51E-02 | 3.30 | up | ENSRNOT00000012605  | Unc45b_predicted     |              | ENSRNOT00000012605  | 303373 |  | XM 220771    |  |  |
| A 44 P1028196 | 1.12E-04 | 2.00E-03 | 3.29 | up | NM 001017467        | LOC362934            | NM 001017467 | ENSRNOT00000009333  | 362934 |  | NM 001017467 |  |  |
| A 44 P462661  | 9.18E-03 | 2.00E-02 | 3.28 | up | NM 022194           | lfl1m                | NM 022194    | ENSRNOT00000007949  | 60582  |  | NM 022194    |  |  |
| A 44 P928825  | 6.48E-03 | 1.62E-02 | 3.26 | up | ENSRNOT00000017339  | RGD1564316_predicted |              | ENSRNOT00000017339  | 498638 |  | XM 573919    |  |  |
| A 44 P502793  | 2.89E-05 | 1.03E-03 | 3.26 | up | NM 001009714        | RGD1307700           | NM 001009714 | ENSRNOT00000024959  | 363219 |  | NM 001009714 |  |  |
| A 44 P776057  | 4.19E-03 | 1.25E-02 | 3.26 | up | ENSRNOT000000031927 | ENSRNOT000000031927  |              | ENSRNOT000000031927 |        |  |              |  |  |
| A 42 P605711  | 2.64E-03 | 9.48E-03 | 3.25 | up | XM 217218           | RGD1311381_predicted | XM 217218    |                     | 300870 |  | XM 001063356 |  |  |
| A 44 P279738  | 2.22E-02 | 3.63E-02 | 3.25 | up | AW533978            | AW533978             | AW533978     |                     |        |  |              |  |  |
| A 44 P236197  | 1.76E-03 | 7.73E-03 | 3.24 | up | NM 020096           | lflit1               | NM 020096    | ENSRNOT00000025770  | 56824  |  | NM 020096    |  |  |
| A 44 P313825  | 2.15E-03 | 8.58E-03 | 3.23 | up | NM 019335           | Prkr                 | NM 019335    |                     | 54287  |  | NM 019335    |  |  |
| A 44 P1003716 | 3.16E-05 | 1.04E-03 | 3.22 | up | NM 001082409        | RGD1566133_predicted | NM 001082409 | ENSRNOT000000044073 | 361219 |  | NM 001082409 |  |  |
| A 44 P948776  | 1.55E-03 | 7.31E-03 | 3.22 | up | TC598429            | TC598429             |              |                     |        |  |              |  |  |
| A 42 P737278  | 7.30E-03 | 1.74E-02 | 3.22 | up | XM 217218           | RGD1311381_predicted | XM 217218    |                     | 300870 |  | XM 001063356 |  |  |
| A 42 P511274  | 8.45E-04 | 5.33E-03 | 3.21 | up | NM 001008843        | RT1-CE5              | NM 001008843 | ENSRNOT000000047779 | 309607 |  | NM 001008843 |  |  |
| A 44 P622837  | 1.66E-03 | 7.46E-03 | 3.20 | up | TC601277            | TC601277             |              |                     |        |  |              |  |  |
| A 43 P15564   | 3.27E-02 | 4.74E-02 | 3.18 | up | NM 023951           | Og9x                 | NM 023951    | ENSRNOT00000013296  | 58922  |  | NM 023951    |  |  |
| A 44 P541608  | 3.72E-03 | 1.16E-02 | 3.18 | up | ENSRNOT00000013209  | Pls1_predicted       |              | ENSRNOT00000013209  | 315926 |  | NM 236560    |  |  |
| A 44 P763036  | 1.00E-02 | 2.13E-02 | 3.18 | up | TC608341            | TC608341             |              |                     |        |  |              |  |  |
| A 44 P122632  | 4.76E-04 | 3.98E-03 | 3.17 | up | CF111193            | B2m                  | CF111193     |                     | 24223  |  |              |  |  |
| A 44 P110582  | 2.54E-02 | 3.97E-02 | 3.16 | up | AA818099            | AA818099             | AA818099     |                     |        |  |              |  |  |
| A 44 P944432  | 7.54E-04 | 5.06E-03 | 3.16 | up | ENSRNOT00000008917  | ENSRNOT00000008917   |              | ENSRNOT00000008917  |        |  | XR 005444    |  |  |
| A 44 P212922  | 1.48E-02 | 2.76E-02 | 3.15 | up | ENSRNOT00000026204  | Zfp329_predicted     |              | ENSRNOT00000026204  | 308361 |  | XM 218291    |  |  |
| A 44 P794371  | 4.08E-03 | 1.23E-02 | 3.15 | up | TC595868            | TC595868             |              |                     |        |  |              |  |  |
| A 44 P541426  | 1.92E-02 | 3.28E-02 | 3.15 | up | NM 001011961        | Sms                  | NM 001011961 | ENSRNOT00000017668  | 296472 |  | NM 001011961 |  |  |
| A 44 P469129  | 3.21E-04 | 3.32E-03 | 3.15 | up | XM 221091           | RGD1562156_predicted | XM 221091    |                     | 501740 |  | XM 221091    |  |  |
| A 44 P916002  | 1.34E-02 | 2.57E-02 | 3.14 | up | TC591354            | TC591354             |              |                     |        |  |              |  |  |
| A 44 P901064  | 1.10E-03 | 6.03E-03 | 3.14 | up | TC625353            | TC625353             |              |                     |        |  |              |  |  |
| A 44 P358361  | 1.10E-02 | 2.26E-02 | 3.12 | up | NM 001002821        | H2-T18               | NM 001002821 | ENSRNOT00000061394  | 406194 |  | NM 001002821 |  |  |
| A 42 P759524  | 1.28E-03 | 6.46E-03 | 3.12 | up | NM 022957           | Serpina5             | NM 022957    | ENSRNOT00000013138  | 65051  |  | NM 022957    |  |  |
| A 44 P515734  | 1.11E-03 | 6.06E-03 | 3.11 | up | XM 345197           | XM 345197            | XM 345197    | ENSRNOT00000011932  |        |  |              |  |  |
| A 44 P1003715 | 1.44E-05 | 7.92E-04 | 3.11 | up | NM 001082409        | RGD1566133_predicted | NM 001082409 |                     | 361219 |  | NM 001082409 |  |  |
| A 42 P811256  | 2.05E-03 | 8.38E-03 | 3.10 | up | NM 001025623        | Vnn1                 | NM 001025623 | ENSRNOT000000021694 | 29142  |  | NM 001025623 |  |  |
| A 44 P314056  | 2.48E-03 | 9.25E-03 | 3.09 | up | XM 227188           | RGD1563197_predicted | XM 227188    |                     | 295076 |  | XM 227188    |  |  |
| A 44 P510949  | 2.92E-02 | 4.40E-02 | 3.09 | up | ENSRNOT00000028443  | Ms4at_predicted      |              | ENSRNOT00000028443  | 293744 |  | XM 215200    |  |  |
| A 43 P17738   | 2.49E-03 | 9.25E-03 | 3.09 | up | BC101897            | LOC684538            | BC101897     |                     | 684538 |  |              |  |  |
| A 43 P15904   | 1.35E-02 | 2.60E-02 | 3.09 | up | ENSRNOT00000028780  | Fcgr1                |              | ENSRNOT00000028780  | 295279 |  | XM 215643    |  |  |
| A 43 P11442   | 4.24E-04 | 3.79E-03 | 3.08 | up | NM 012512           | B2m                  | NM 012512    | ENSRNOT00000023017  | 24223  |  | NM 012512    |  |  |
| A 44 P779207  | 3.32E-03 | 1.09E-02 | 3.07 | up | TC601137            | TC601137             |              |                     |        |  |              |  |  |
| A 44 P390495  | 6.72E-03 | 1.66E-02 | 3.07 | up | NM 024356           | Gch                  | NM 024356    |                     | 29244  |  | NM 024356    |  |  |
| A 44 P549304  | 6.48E-03 | 1.62E-02 | 3.06 | up | NM 053374           | lfl18bp              | NM 053374    | ENSRNOT00000027301  | 84388  |  | NM 053374    |  |  |
| A 44 P265045  | 1.56E-03 | 7.31E-03 | 3.06 | up | A 44 P265045        | A 44 P265045         |              |                     |        |  |              |  |  |
| A 44 P288379  | 1.60E-03 | 7.37E-03 | 3.06 | up | ENSRNOT00000042721  | ENSRNOT00000042721   |              | ENSRNOT00000042721  |        |  |              |  |  |
| A 44 P946378  | 2.35E-03 | 8.99E-03 | 3.06 | up | TC606523            | TC606523             |              |                     |        |  |              |  |  |
| A 44 P782373  | 1.52E-03 | 7.26E-03 | 3.06 | up | AW144229            | AW144229             | AW144229     |                     |        |  |              |  |  |
| A 44 P885692  | 1.76E-02 | 3.10E-02 | 3.05 | up | TC641432            | TC641432             |              |                     |        |  |              |  |  |



|      |          |          |          |      |    |                     |                      |                     |                     |              |              |
|------|----------|----------|----------|------|----|---------------------|----------------------|---------------------|---------------------|--------------|--------------|
| A 44 | P483190  | 6.89E-04 | 4.83E-03 | 2.46 | up | XM 236392           | RGD1308795 predicted | XM 236392           | ENSRNOT00000030629  | 315804       | XM 236392    |
| A 44 | P228228  | 1.57E-03 | 7.32E-03 | 2.45 | up | AW916309            | AW916309             | AW916309            |                     |              |              |
| A 44 | P744256  | 1.39E-02 | 2.64E-02 | 2.45 | up | ENSRNOT00000028558  | ENSRNOT00000028558   |                     | ENSRNOT00000028558  |              | XM 001077920 |
| A 44 | P975418  | 2.10E-05 | 9.36E-04 | 2.45 | up | CK599755            | CK599755             | CK599755            |                     |              |              |
| A 44 | P533794  | 1.65E-02 | 2.97E-02 | 2.45 | up | NM 130426           | Tnfrsfb              | NM 130426           | ENSRNOT00000050667  | 156767       | NM 130426    |
| A 44 | P454192  | 5.80E-03 | 1.51E-02 | 2.44 | up | NM 012655           | Sp1                  | NM 012655           | ENSRNOT00000019403  | 24790        | NM 012655    |
| A 44 | P111003  | 2.56E-03 | 9.36E-03 | 2.44 | up | BE111972            | BE111972             | BE111972            |                     |              |              |
| A 44 | P116841  | 2.59E-02 | 4.02E-02 | 2.44 | up | ENSRNOT00000018407  | Spata13 predicted    | ENSRNOT00000018407  | 305938              | XM 224253    |              |
| A 43 | P15989   | 1.47E-03 | 7.21E-03 | 2.44 | up | NM 053775           | Atp6v0a2             | NM 053775           | ENSRNOT0000001349   | 116455       | NM 053775    |
| A 43 | P18233   | 9.20E-03 | 2.00E-02 | 2.44 | up | ENSRNOT00000049810  | RGD1560320 predicted | ENSRNOT00000049810  | 361987              | XM 342287    |              |
| A 44 | P252728  | 2.92E-02 | 4.40E-02 | 2.43 | up | ENSRNOT00000051182  | RGD1564240 predicted | ENSRNOT00000051182  | 290177              | XM 001081630 |              |
| A 43 | P19072   | 7.08E-03 | 1.70E-02 | 2.43 | up | ENSRNOT00000048446  | RGD1305866 predicted | ENSRNOT00000048446  | 362937              | XM 343265    |              |
| A 44 | P613057  | 3.04E-02 | 4.52E-02 | 2.43 | up | AI548588            | AI548588             | AI548588            |                     |              |              |
| A 44 | P184659  | 2.25E-02 | 3.67E-02 | 2.43 | up | NM 001014009        | RGD1306939           | NM 001014009        | ENSRNOT00000048298  | 306934       | NM 001014009 |
| A 44 | P311136  | 3.00E-02 | 4.48E-02 | 2.43 | up | NM 012759           | Vav1                 | NM 012759           |                     | 25156        | NM 012759    |
| A 44 | P379680  | 3.66E-04 | 3.57E-03 | 2.43 | up | ENSRNOT00000046279  | ENSRNOT00000046279   |                     | ENSRNOT00000046279  |              |              |
| A 44 | P248193  | 1.85E-03 | 7.90E-03 | 2.43 | up | ENSRNOT00000008192  | Rel predicted        | ENSRNOT00000008192  | 305584              | XM 223688    |              |
| A 44 | P487761  | 1.50E-02 | 2.80E-02 | 2.42 | up | NM 001008515        | C1qa                 | NM 001008515        | ENSRNOT00000017385  | 298566       | NM 001008515 |
| A 44 | P480682  | 8.31E-03 | 1.88E-02 | 2.42 | up | ENSRNOT00000037397  | RGD1308850 predicted | ENSRNOT00000037397  | 362424              | XM 342744    |              |
| A 42 | P616287  | 2.94E-02 | 4.42E-02 | 2.41 | up | ENSRNOT00000015897  | C1r                  | ENSRNOT00000015897  | 312705              | XM 242644    |              |
| A 44 | P336423  | 1.92E-02 | 3.28E-02 | 2.41 | up | XM 001065356        | LOC689959            | XM 001065356        | 689959              | XM 001065356 |              |
| A 44 | P433783  | 1.94E-02 | 3.31E-02 | 2.41 | up | NM 001005892        | Sfp1                 | NM 001005892        | ENSRNOT00000016306  | 366126       | NM 001005892 |
| A 44 | P530953  | 9.41E-03 | 2.03E-02 | 2.41 | up | AI169751            | AI169751             | AI169751            |                     |              |              |
| A 44 | P249624  | 7.15E-05 | 1.68E-03 | 2.41 | up | BQ200761            | BQ200761             | BQ200761            |                     |              |              |
| A 44 | P531821  | 1.46E-02 | 2.74E-02 | 2.40 | up | ENSRNOT00000022398  | Hoxc4                | ENSRNOT00000022398  | 24459               | XM 235703    |              |
| A 44 | P155788  | 4.31E-03 | 1.26E-02 | 2.40 | up | ENSRNOT00000005459  | ENSRNOT00000005459   | ENSRNOT00000005459  | ENSRNOT00000005459  |              | XM 001065025 |
| A 44 | P1028549 | 5.59E-04 | 4.26E-03 | 2.40 | up | NM 053736           | Casp4                | NM 053736           | ENSRNOT00000061973  | 114555       | NM 053736    |
| A 44 | P273821  | 1.03E-02 | 2.16E-02 | 2.40 | up | NM 030857           | Lyn                  | NM 030857           | ENSRNOT00000011310  | 81515        | NM 030857    |
| A 42 | P762150  | 3.06E-02 | 4.54E-02 | 2.40 | up | XM 223600           | RGD1562979 predicted | XM 223600           | 305501              | XM 223600    |              |
| A 42 | P726091  | 2.50E-05 | 1.02E-03 | 2.40 | up | BX883048            | BX883048             | BX883048            |                     |              |              |
| A 43 | P19806   | 2.56E-02 | 3.99E-02 | 2.39 | up | XM 341175           | XM 341175            | XM 341175           |                     |              |              |
| A 44 | P369083  | 1.44E-02 | 2.71E-02 | 2.39 | up | AA996984            | AA996984             | AA996984            |                     |              |              |
| A 44 | P686987  | 1.15E-02 | 2.33E-02 | 2.39 | up | NM 001025147        | Gpr160               | NM 001025147        | ENSRNOT00000012560  | 499588       | NM 001025147 |
| A 44 | P473098  | 2.71E-03 | 9.55E-03 | 2.39 | up | ENSRNOT000000031129 | ENSRNOT000000031129  | ENSRNOT000000031129 | ENSRNOT000000031129 |              | XM 001055174 |
| A 42 | P797381  | 8.72E-05 | 1.81E-03 | 2.39 | up | NM 032056           | Tap2                 | NM 032056           | ENSRNOT0000000527   | 24812        | NM 032056    |
| A 42 | P506685  | 5.32E-04 | 4.21E-03 | 2.39 | up | NM 145717           | Fxyd2                | NM 145717           | ENSRNOT00000022074  | 29639        | NM 145717    |
| A 44 | P602351  | 1.22E-02 | 2.43E-02 | 2.39 | up | AI556784            | AI556784             | AI556784            |                     |              |              |
| A 42 | P671477  | 1.39E-02 | 2.65E-02 | 2.38 | up | NM 033376           | Kcnk3                | NM 033376           | ENSRNOT00000013107  | 29553        | NM 033376    |
| A 44 | P166581  | 1.01E-02 | 2.14E-02 | 2.38 | up | ENSRNOT00000039434  | Ifitm7 predicted     | ENSRNOT00000039434  | 288244              | XM 221637    |              |
| A 44 | P468141  | 1.02E-02 | 2.14E-02 | 2.38 | up | NM 134352           | Plaur                | NM 134352           |                     | 50692        | NM 134352    |
| A 44 | P295803  | 3.25E-02 | 4.73E-02 | 2.37 | up | BF390414            | BF390414             | BF390414            |                     |              |              |
| A 44 | P1038296 | 2.48E-02 | 3.90E-02 | 2.37 | up | NM 001031638        | Cd68                 | NM 001031638        | ENSRNOT00000056918  | 287435       | NM 001031638 |
| A 43 | P21748   | 1.61E-02 | 2.92E-02 | 2.37 | up | CB547055            | CB547055             | CB547055            | ENSRNOT00000037448  |              | XM 001067657 |
| A 42 | P634675  | 3.03E-02 | 4.52E-02 | 2.37 | up | NM 020101           | Centa2               | NM 020101           |                     | 56826        | NM 020101    |
| A 44 | P438060  | 1.26E-02 | 2.48E-02 | 2.36 | up | NM 053542           | Gna15                | NM 053542           | ENSRNOT00000007202  | 89788        | NM 053542    |
| A 44 | P1041312 | 1.34E-02 | 2.58E-02 | 2.35 | up | ENSRNOT00000016032  | RGD1564385 predicted | ENSRNOT00000016032  | 361597              | XM 341876    |              |
| A 44 | P477827  | 5.67E-03 | 1.49E-02 | 2.35 | up | ENSRNOT00000041688  | Sgk2                 | ENSRNOT00000041688  | 171497              | XM 342570    |              |
| A 44 | P498136  | 8.63E-03 | 1.92E-02 | 2.35 | up | AA925800            | AA925800             | AA925800            |                     |              |              |
| A 44 | P535156  | 1.98E-02 | 3.35E-02 | 2.35 | up | AW253668            | AW253668             | AW253668            |                     |              |              |
| A 44 | P920712  | 8.09E-03 | 1.85E-02 | 2.35 | up | BC099233            | LOC499337            | BC099233            | ENSRNOT00000015668  | 499337       | XM 001078906 |
| A 44 | P410167  | 2.75E-02 | 4.20E-02 | 2.35 | up | XM 225887           | RGD1309038           | XM 225887           |                     | 307393       |              |
| A 44 | P606174  | 2.97E-02 | 4.44E-02 | 2.34 | up | NM 001024338        | LOC500348            | NM 001024338        | ENSRNOT00000032219  | 500348       | NM 001024338 |
| A 44 | P974862  | 1.81E-02 | 3.16E-02 | 2.34 | up | ENSRNOT00000029017  | LOC362792            | ENSRNOT00000029017  | 362792              | XM 576106    |              |
| A 44 | P498972  | 1.04E-02 | 2.16E-02 | 2.34 | up | ENSRNOT00000061180  | Eya4 predicted       | ENSRNOT00000061180  | 292172              | XM 217715    |              |
| A 44 | P534310  | 1.17E-02 | 2.35E-02 | 2.33 | up | XM 224103           | XM 224103            | XM 224103           |                     |              |              |
| A 44 | P227551  | 1.10E-02 | 2.26E-02 | 2.33 | up | ENSRNOT00000008630  | Fyco1 predicted      | ENSRNOT00000008630  | 301085              | XM 236739    |              |
| A 42 | P824217  | 1.34E-02 | 2.57E-02 | 2.33 | up | ENSRNOT00000014139  | Dapp1 predicted      | ENSRNOT00000014139  | 362046              | XM 342348    |              |
| A 44 | P958227  | 2.63E-02 | 4.06E-02 | 2.33 | up | BF286911            | BF286911             | BF286911            |                     |              |              |
| A 44 | P384404  | 2.36E-02 | 3.78E-02 | 2.32 | up | ENSRNOT00000033795  | Ms4a11 predicted     | ENSRNOT00000033795  | 361735              | XM 342028    |              |
| A 43 | P17016   | 1.64E-02 | 2.96E-02 | 2.31 | up | ENSRNOT00000024018  | Unc93b1              | ENSRNOT00000024018  | 361689              | XM 341972    |              |
| A 44 | P133924  | 9.49E-03 | 2.04E-02 | 2.31 | up | BE101505            | BE101505             | BE101505            |                     |              |              |
| A 44 | P336951  | 2.38E-03 | 9.02E-03 | 2.31 | up | XM 578699           | LOC503175            | XM 578699           |                     | 503175       | XM 578699    |
| A 44 | P488185  | 2.37E-03 | 9.02E-03 | 2.31 | up | ENSRNOT00000057016  | Ascc3 predicted      | ENSRNOT00000057016  | 309887              | XM 228345    |              |
| A 44 | P330943  | 1.61E-04 | 2.41E-03 | 2.31 | up | XM 346119           | XM 346119            | XM 346119           |                     |              |              |
| A 43 | P11507   | 2.86E-03 | 9.81E-03 | 2.31 | up | NM 012662           | Svp4                 | NM 012662           | ENSRNOT00000018456  | 24802        | NM 012662    |
| A 44 | P610991  | 2.56E-02 | 3.99E-02 | 2.30 | up | TC649236            | TC649236             | TC649236            |                     |              |              |
| A 44 | P545727  | 1.32E-04 | 2.09E-03 | 2.30 | up | ENSRNOT00000033984  | Fin29                | ENSRNOT00000033984  | 114635              | XM 341086    |              |
| A 42 | P813840  | 2.45E-03 | 9.22E-03 | 2.30 | up | ENSRNOT00000038178  | Tapbp1 predicted     | ENSRNOT00000038178  | 297602              | XM 232355    |              |
| A 44 | P414615  | 2.42E-04 | 3.04E-03 | 2.30 | up | NM 080891           | Daxx                 | NM 080891           | ENSRNOT00000005559  | 140926       | NM 080891    |
| A 44 | P402220  | 3.47E-02 | 4.96E-02 | 2.30 | up | AI104907            | AI104907             | AI104907            |                     |              |              |
| A 44 | P539444  | 1.18E-02 | 2.36E-02 | 2.30 | up | AA997385            | AA997385             | AA997385            |                     |              |              |
| A 44 | P326122  | 1.88E-02 | 3.24E-02 | 2.29 | up | ENSRNOT00000012406  | RGD1308019 predicted | ENSRNOT00000012406  | 311795              | XM 231045    |              |
| A 44 | P784689  | 1.27E-02 | 2.49E-02 | 2.29 | up | A 44 P784689        | A 44 P784689         |                     |                     |              |              |
| A 44 | P623330  | 2.66E-02 | 4.11E-02 | 2.29 | up | BC098786            | BC098786             | BC098786            |                     |              |              |
| A 44 | P415269  | 1.53E-02 | 2.81E-02 | 2.29 | up | ENSRNOT00000015330  | Rhbd16 predicted     | ENSRNOT00000015330  | 303690              | XM 221133    |              |
| A 44 | P743248  | 1.24E-02 | 2.46E-02 | 2.29 | up | AI599340            | AI599340             | AI599340            |                     |              |              |
| A 44 | P168674  | 1.10E-02 | 2.26E-02 | 2.29 | up | XM 001053057        | RGD1562846 predicted | XM 001053057        | 502694              | XM 001053057 |              |
| A 44 | P241055  | 2.13E-02 | 3.52E-02 | 2.29 | up | XM 344830           | XM 344830            | XM 344830           |                     |              |              |
| A 44 | P335402  | 1.65E-03 | 7.44E-03 | 2.29 | up | XM 341584           | Moccs predicted      | XM 341584           |                     | 361300       | XM 341584    |
| A 44 | P469584  | 2.50E-02 | 3.92E-02 | 2.28 | up | NM 021744           | Cd14                 | NM 021744           | ENSRNOT00000023977  | 60350        | NM 021744    |
| A 44 | P123158  | 4.84E-03 | 1.36E-02 | 2.28 | up | AA965150            | AA965150             | AA965150            |                     |              |              |
| A 44 | P363403  | 1.39E-02 | 2.65E-02 | 2.27 | up | A 44 P363403        | A 44 P363403         |                     |                     |              |              |
| A 44 | P490231  | 5.27E-03 | 1.43E-02 | 2.27 | up | ENSRNOT00000020516  | RGD1561662 predicted | ENSRNOT00000020516  | 301232              | XM 236949    |              |
| A 44 | P646876  | 1.65E-02 | 2.96E-02 | 2.27 | up | XM 001062602        | RGD1562552 predicted | XM 001062602        | 498840              | XM 001062602 |              |
| A 44 | P468879  | 2.77E-02 | 4.22E-02 | 2.27 | up | NM 001007798        | Btk                  | NM 001007798        | ENSRNOT00000043770  | 367901       | NM 001007798 |
| A 43 | P21322   | 2.90E-02 | 4.38E-02 | 2.26 | up | NM 001011898        | Hcls1                | NM 001011898        | ENSRNOT00000003326  | 288077       | NM 001011898 |
| A 44 | P232508  | 1.85E-02 | 3.20E-02 | 2.26 | up | AW917502            | AW917502             | AW917502            |                     |              |              |
| A 42 | P817228  | 4.66E-03 | 1.32E-02 | 2.26 | up | NM 001004260        | Slc22a18             | NM 001004260        | ENSRNOT00000027925  | 309131       | NM 001004260 |
| A 44 | P217451  | 8.09E-04 | 5.20E-03 | 2.26 | up | NM 012896           | Adora3               | NM 012896           | ENSRNOT00000021236  | 25370        | NM 012896    |
| A 43 | P18082   | 2.96E-03 | 1.00E-02 | 2.26 | up | ENSRNOT00000013499  | RGD1565845 predicted | ENSRNOT00000013499  | 361968              | XM 342266    |              |
| A 44 | P128186  | 1.09E-02 | 2.26E-02 | 2.26 | up | ENSRNOT00000013385  | Tas1r1               | ENSRNOT00000013385  | 29407               | XM 342986    |              |
| A 43 | P21848   | 2.64E-03 | 9.48E-03 | 2.26 | up | ENSRNOT00000003131  | RGD1359201           | ENSRNOT00000003131  | 289595              | XM 001077093 |              |
| A 44 | P321468  | 2.09E-02 | 3.46E-02 | 2.26 | up | XM 346251           | XM 346251            | XM 346251           |                     |              |              |
| A 44 | P879764  | 2.46E-02 | 3.88E-   |      |    |                     |                      |                     |                     |              |              |

|               |          |          |      |    |                     |                      |                     |                     |              |           |
|---------------|----------|----------|------|----|---------------------|----------------------|---------------------|---------------------|--------------|-----------|
| A 44 P226597  | 1.61E-02 | 2.92E-02 | 2.20 | up | NM 172322           | Pycard               | NM 172322           | ENSRNOT00000026699  | 282817       | NM 172322 |
| A 44 P1039249 | 2.35E-02 | 3.77E-02 | 2.19 | up | ENSRNOT00000018232  | Dok3 predicted       | ENSRNOT00000018232  | 306760              | XM 225170    |           |
| A 44 P160180  | 3.05E-03 | 1.03E-02 | 2.19 | up | Ai501707            | Ai501707             |                     |                     |              |           |
| A 44 P698940  | 2.83E-03 | 9.76E-03 | 2.18 | up | ENSRNOT00000018640  | ENSRNOT00000018640   | ENSRNOT00000018640  |                     | XM 00105675  |           |
| A 43 P19606   | 1.52E-02 | 2.81E-02 | 2.18 | up | XM 001071999        | Sic12a7              | XM 001071999        | 308069              | XM 001060536 |           |
| A 44 P240330  | 3.49E-02 | 4.98E-02 | 2.18 | up | NM 001044394        | Abim1_predicted      | NM 001044394        | ENSRNOT00000018408  | 307989       |           |
| A 44 P111221  | 1.40E-02 | 2.66E-02 | 2.18 | up | Ai043601            | Ai043601             | Ai043601            |                     |              |           |
| A 44 P373731  | 1.26E-02 | 2.49E-02 | 2.18 | up | BU760410            | BU760410             | BU760410            |                     |              |           |
| A 44 P342212  | 8.30E-03 | 1.88E-02 | 2.18 | up | A 44 P342212        | A 44 P342212         |                     |                     |              |           |
| A 44 P429202  | 2.42E-02 | 3.83E-02 | 2.18 | up | ENSRNOT00000004533  | RGD1563952_predicted | ENSRNOT00000004533  | 363463              | XM 343782    |           |
| A 44 P530431  | 1.09E-02 | 2.25E-02 | 2.18 | up | BF567797            | BF567797             | BF567797            |                     |              |           |
| A 44 P499608  | 4.68E-04 | 3.94E-03 | 2.18 | up | XM 340895           | RGD1561080_predicted | XM 340895           | 360620              | XM 340895    |           |
| A 44 P362714  | 2.30E-02 | 3.74E-02 | 2.18 | up | ENSRNOT00000002151  | Bach1_predicted      | ENSRNOT00000002151  | 304127              | XM 221712    |           |
| A 44 P478515  | 2.86E-02 | 4.34E-02 | 2.18 | up | XR 005956           | LOC300225            | XR 005956           | 300225              | XM 001063650 |           |
| A 42 P566250  | 5.04E-03 | 1.39E-02 | 2.18 | up | ENSRNOT00000003901  | ENSRNOT00000003901   | ENSRNOT00000003901  |                     | XM 001065242 |           |
| A 44 P964308  | 5.24E-03 | 1.42E-02 | 2.18 | up | CK476066            | CK476066             | CK476066            |                     |              |           |
| A 44 P286788  | 1.79E-02 | 3.14E-02 | 2.17 | up | ENSRNOT00000009544  | LOC500904            | ENSRNOT00000009544  | 500904              | XM 576306    |           |
| A 44 P161602  | 7.74E-03 | 1.81E-02 | 2.16 | up | NM 001024331        | Rab43                | NM 001024331        | ENSRNOT00000013299  | 500249       |           |
| A 44 P175530  | 1.54E-02 | 2.82E-02 | 2.16 | up | NM 001025750        | Plek                 | NM 001025750        | ENSRNOT00000007044  | 364206       |           |
| A 44 P342020  | 4.10E-03 | 1.23E-02 | 2.16 | up | NM 005317           | Shc1                 | NM 005317           | ENSRNOT00000056652  | 85385        |           |
| A 44 P152144  | 1.32E-03 | 6.64E-03 | 2.16 | up | NM 001025637        | Psmb10               | NM 001025637        | ENSRNOT00000026462  | 291983       |           |
| A 44 P123704  | 9.45E-03 | 2.04E-02 | 2.15 | up | A 44 P123704        | A 44 P123704         |                     |                     |              |           |
| A 44 P541397  | 2.92E-02 | 4.40E-02 | 2.15 | up | NM 001025733        | Procr                | NM 001025733        | ENSRNOT00000026135  | 362248       |           |
| A 44 P193726  | 2.01E-02 | 3.38E-02 | 2.15 | up | AI169161            | AI169161             | AI169161            |                     |              |           |
| A 44 P327492  | 1.69E-02 | 3.01E-02 | 2.15 | up | AW917621            | AW917621             | AW917621            |                     |              |           |
| A 44 P317259  | 8.74E-03 | 1.93E-02 | 2.15 | up | ENSRNOT00000019329  | Eif4g3_predicted     | ENSRNOT00000019329  | 298573              | XM 216563    |           |
| A 44 P410348  | 2.97E-02 | 4.44E-02 | 2.15 | up | XM 216640           | Card12_predicted     | XM 216640           | 298784              | XM 166440    |           |
| A 42 P692008  | 6.14E-03 | 1.57E-02 | 2.15 | up | ENSRNOT000000021909 | ENSRNOT000000021909  | ENSRNOT000000021909 |                     | XM 001069441 |           |
| A 44 P283812  | 2.73E-02 | 4.18E-02 | 2.15 | up | NM 001014041        | LOC310721            | NM 001014041        | ENSRNOT00000020401  | 310721       |           |
| A 44 P182494  | 1.97E-02 | 3.34E-02 | 2.14 | up | XM 224104           | XM 224104            | XM 224104           | ENSRNOT000000042489 |              |           |
| A 44 P240881  | 1.57E-02 | 2.86E-02 | 2.14 | up | NM 001012034        | Art3                 | NM 001012034        | ENSRNOT00000003071  | 305235       |           |
| A 44 P120405  | 1.16E-02 | 2.34E-02 | 2.14 | up | AW526982            | AW526982             | AW526982            |                     |              |           |
| A 44 P135213  | 3.80E-03 | 1.18E-02 | 2.14 | up | ENSRNOT00000000814  | ENSRNOT00000000814   | ENSRNOT00000000814  |                     | XM 001062978 |           |
| A 44 P859124  | 1.18E-02 | 2.36E-02 | 2.14 | up | CB328239            | LOC689165            | CB328239            |                     | 689165       |           |
| A 44 P986952  | 1.46E-02 | 2.74E-02 | 2.14 | up | AW916350            | AW916350             | AW916350            |                     |              |           |
| A 44 P292730  | 7.81E-03 | 1.81E-02 | 2.14 | up | NM 001013232        | Rnase1_predicted     | NM 001013232        | ENSRNOT000000033809 | 364303       |           |
| A 44 P307491  | 3.46E-03 | 1.12E-02 | 2.13 | up | AA955165            | AA955165             | AA955165            |                     |              |           |
| A 42 P773606  | 1.84E-02 | 3.19E-02 | 2.13 | up | XM 214867           | RGD1562091_predicted | XM 214867           |                     | 292690       |           |
| A 43 P15993   | 2.30E-02 | 3.74E-02 | 2.13 | up | NM 012711           | Itgam                | NM 012711           |                     | 25021        |           |
| A 44 P248705  | 2.90E-03 | 9.92E-03 | 2.13 | up | ENSRNOT00000002150  | Usp25_predicted      | ENSRNOT00000002150  | 304150              | XM 221722    |           |
| A 43 P11577   | 1.74E-02 | 3.07E-02 | 2.12 | up | NM 012823           | Anxa3                | NM 012823           | ENSRNOT00000002806  | 25291        |           |
| A 43 P18366   | 1.73E-03 | 7.68E-03 | 2.12 | up | NM 001039197        | Torb1                | NM 001039197        | ENSRNOT00000009002  | 311854       |           |
| A 44 P917653  | 1.55E-03 | 7.31E-03 | 2.12 | up | NM 001024339        | LOC500377            | NM 001024339        |                     | 500377       |           |
| A 44 P426407  | 2.92E-04 | 3.21E-03 | 2.12 | up | ENSRNOT00000047071  | ENSRNOT00000047071   | ENSRNOT00000047071  |                     | XM 214483    |           |
| A 43 P21780   | 3.81E-04 | 3.67E-03 | 2.12 | up | CB547076            | CB547076             | CB547076            |                     |              |           |
| A 44 P872195  | 3.21E-02 | 4.70E-02 | 2.11 | up | ENSRNOT00000015668  | LOC499337            | ENSRNOT00000015668  | 499337              | XM 001078906 |           |
| A 44 P553098  | 4.26E-04 | 3.80E-03 | 2.11 | up | NM 001044247        | LOC361187            | NM 001044247        |                     | 361187       |           |
| A 44 P1052067 | 1.08E-03 | 6.02E-03 | 2.11 | up | NM 199101           | Plekha4              | NM 199101           |                     | 308584       |           |
| A 43 P15890   | 1.72E-02 | 3.05E-02 | 2.11 | up | Nm 031567           | Nfc                  | NM 031567           | ENSRNOT00000037190  | 29228        |           |
| A 44 P129187  | 1.13E-02 | 2.31E-02 | 2.11 | up | ENSRNOT00000014885  | Il17r_predicted      | ENSRNOT00000014885  | 312679              | XM 232247    |           |
| A 44 P794508  | 6.68E-03 | 1.65E-02 | 2.10 | up | A 44 P794508        | A 44 P794508         |                     |                     |              |           |
| A 44 P104630  | 5.40E-03 | 1.45E-02 | 2.10 | up | NM 173840           | Lat2                 | NM 173840           | ENSRNOT00000034629  | 317676       |           |
| A 43 P21690   | 7.63E-03 | 1.79E-02 | 2.10 | up | ENSRNOT00000002150  | Usp25_predicted      | ENSRNOT00000002150  | 304150              | XM 221722    |           |
| A 44 P504261  | 1.18E-04 | 2.02E-03 | 2.10 | up | NM 001014102        | RGD1309930           | NM 001014102        | ENSRNOT000000021527 | 316426       |           |
| A 44 P972303  | 3.38E-05 | 1.10E-03 | 2.10 | up | AW916976            | AW916976             | AW916976            |                     |              |           |
| A 44 P168602  | 1.08E-03 | 6.02E-03 | 2.10 | up | NM 001037649        | RGD1306676           | NM 001037649        | ENSRNOT00000006172  | 311020       |           |
| A 43 P11888   | 2.51E-03 | 9.28E-03 | 2.10 | up | NM 017264           | Psmc1                | NM 017264           | ENSRNOT000000044024 | 29630        |           |
| A 44 P398663  | 9.41E-03 | 2.03E-02 | 2.10 | up | ENSRNOT00000056577  | ENSRNOT00000056577   | ENSRNOT00000056577  |                     | XR 006542    |           |
| A 43 P22203   | 1.88E-02 | 3.24E-02 | 2.09 | up | ENSRNOT00000037107  | Zip46_predicted      | ENSRNOT00000037107  | 362925              | XM 343255    |           |
| A 44 P534753  | 4.39E-03 | 1.28E-02 | 2.09 | up | ENSRNOT000000026375 | Zmynd15_predicted    | ENSRNOT000000026375 | 287457              | XM 213338    |           |
| A 44 P391302  | 1.89E-03 | 8.06E-03 | 2.09 | up | NM 022218           | Cmkir1               | NM 022218           | ENSRNOT00000000893  | 60669        |           |
| A 44 P355861  | 1.73E-03 | 7.68E-03 | 2.09 | up | NM 181475           | Cd2ap                | NM 181475           | ENSRNOT00000016291  | 316258       |           |
| A 44 P176726  | 7.81E-04 | 5.13E-03 | 2.08 | up | TC615205            | TC615205             | TC615205            |                     |              |           |
| A 43 P10241   | 2.72E-02 | 4.16E-02 | 2.08 | up | CB806336            | CB806336             | CB806336            |                     |              |           |
| A 43 P22080   | 2.24E-02 | 3.66E-02 | 2.08 | up | NM 001012044        | Lcp1                 | NM 001012044        | ENSRNOT00000058275  | 306071       |           |
| A 44 P554698  | 3.81E-03 | 1.18E-02 | 2.08 | up | NM 017257           | Psmc2                | NM 017257           | ENSRNOT00000026279  | 29614        |           |
| A 44 P775910  | 3.18E-02 | 4.66E-02 | 2.08 | up | NM 001047864        | Dppa3                | NM 001047864        | ENSRNOT00000043783  | 297576       |           |
| A 44 P289925  | 1.92E-02 | 3.28E-02 | 2.07 | up | AW913991            | AW913991             | AW913991            |                     |              |           |
| A 43 P20311   | 5.20E-03 | 1.42E-02 | 2.07 | up | ENSRNOT00000019966  | Hs6st1_predicted     | ENSRNOT00000019966  | 316325              | XM 237060    |           |
| A 43 P21856   | 1.32E-04 | 2.09E-03 | 2.07 | up | NM 001025416        | Dok1                 | NM 001025416        | ENSRNOT00000010020  | 312477       |           |
| A 44 P915588  | 5.27E-04 | 4.21E-03 | 2.07 | up | TC603227            | TC603227             | TC603227            |                     |              |           |
| A 43 P12529   | 8.40E-03 | 1.89E-02 | 2.06 | up | NM 031126           | Sixbp2               | NM 031126           | ENSRNOT00000001322  | 81804        |           |
| A 44 P373071  | 7.50E-03 | 1.77E-02 | 2.06 | up | NM 001036626        | Zip36i2              | NM 001036626        | ENSRNOT00000006725  | 298765       |           |
| A 44 P547850  | 1.60E-02 | 2.90E-02 | 2.06 | up | NM 198049           | Soat                 | NM 198049           | ENSRNOT00000002819  | 298459       |           |
| A 42 P778115  | 7.29E-04 | 4.98E-03 | 2.06 | up | ENSRNOT00000027972  | Phlda2_predicted     | ENSRNOT00000027972  | 293637              | XM 215132    |           |
| A 43 P20658   | 2.33E-02 | 3.76E-02 | 2.06 | up | ENSRNOT000000006786 | Angpt4_predicted     | ENSRNOT000000006786 | 296269              | XM 215890    |           |
| A 44 P424396  | 7.62E-03 | 1.79E-02 | 2.06 | up | NM 001037353        | Etv6                 | NM 001037353        | ENSRNOT00000007889  | 312777       |           |
| A 44 P208930  | 3.63E-03 | 1.15E-02 | 2.05 | up | NM 001034917        | Mks1                 | NM 001034917        | ENSRNOT00000011500  | 287612       |           |
| A 42 P653257  | 2.04E-02 | 3.41E-02 | 2.05 | up | NM 145683           | Pipn7                | NM 145683           | ENSRNOT00000007833  | 246781       |           |
| A 44 P131230  | 1.46E-02 | 2.74E-02 | 2.05 | up | NM 001039454        | RGD1561028           | NM 001039454        | ENSRNOT00000037874  | 315283       |           |
| A 44 P295400  | 2.85E-02 | 4.33E-02 | 2.05 | up | ENSRNOT00000010516  | Akna_predicted       | ENSRNOT00000010516  | 362530              | XM 342848    |           |
| A 44 P514939  | 2.08E-02 | 3.45E-02 | 2.05 | up | NM 012515           | Bzrp                 | NM 012515           | ENSRNOT00000014089  | 24230        |           |
| A 44 P1004886 | 7.43E-03 | 1.76E-02 | 2.05 | up | NM 199105           | MGC72614             | NM 199105           | ENSRNOT00000013524  | 310540       |           |
| A 44 P1001528 | 9.38E-04 | 5.56E-03 | 2.05 | up | BC061859            | Tcirg1               | BC061859            | ENSRNOT00000023425  | 293650       |           |
| A 42 P827359  | 3.45E-02 | 4.95E-02 | 2.04 | up | ENSRNOT00000010343  | Mybl2_predicted      | ENSRNOT00000010343  | 296344              | XM 215922    |           |
| A 44 P318861  | 3.04E-02 | 4.52E-02 | 2.04 | up | XM 001060720        | RGD1564142_predicted | XM 001060720        | 498582              | XM 001060720 |           |
| A 44 P988945  | 8.81E-05 | 1.81E-03 | 2.04 | up | AA957187            | AA957187             | AA957187            |                     |              |           |
| A 44 P515792  | 1.83E-02 | 3.18E-02 | 2.04 | up | ENSRNOT00000025516  | Elmo1_predicted      | ENSRNOT00000025516  | 361251              | XM 341532    |           |
| A 43 P18040   | 1.31E-02 | 2.55E-02 | 2.04 | up | NM 001030024        | Sic19a2              | NM 001030024        | ENSRNOT00000003817  | 289175       |           |
| A 44 P1041539 | 1.11E-02 | 2.26E-02 | 2.03 | up | ENSRNOT000000035926 | Arhgap22_predicted   | ENSRNOT000000035926 | 306279              | XM 224637    |           |
| A 44 P145562  | 1.52E-02 | 2.81E-02 | 2.03 | up | XM 001068649        | Dock2                | XM 001068649        | ENSRNOT00000009524  | 360509       |           |
| A 44 P507961  | 1.92E-02 | 3.28E-02 | 2.03 | up | BF414048            | BF414048             | BF414048            |                     |              |           |
| A 43 P21462   | 1.64E-02 | 2.96E-02 | 2.03 | up | XM 342961           | XM 342961            | XM 342961           |                     |              |           |
| A 44 P975347  | 2.82E-04 | 3.21E-03 | 2.03 | up | TC582893            | TC582893             | TC582893            |                     |              |           |
| A 44 P508683  | 6.80E-03 | 1.67E-02 | 2.03 | up | XM 226886           | XM 226886            | XM 226886           |                     |              |           |
| A 44 P777576  | 5.55E-03 | 1.47E-02 | 2.03 | up | TC603447            | TC603447             | TC603447            |                     |              |           |
| A 43 P19334   | 2.61E-02 | 4.05E-02 | 2.03 | up | NM 212536           | Msh5                 | NM 212536           | ENSRNOT00000060762  | 294252       |           |
| A 44 P358082  | 2.35E-02 | 3.77E-02 | 2.02 | up | BI289649            | BI289649             | BI289649            |                     |              |           |
| A 44 P1027971 | 3.03E-02 | 4.52E-02 | 2.02 | up | XM 001068081        | LOC688730            | XM 001068081        |                     | 688730       |           |
| A 44 P1018729 | 1.83E-02 | 3.18E-02 | 2.02 | up | CO562088            | CO562088             | CO562088            |                     |              |           |
| A 44 P468983  | 9.85E-04 | 5.67E-03 | 2.02 | up | NM 001034930        | LOC314655            | NM 001034           |                     |              |           |
